# Supplementary material for: The effect of a political crisis on performance of community- and state-managed forests in Madagascar
Source: Research Square preprint supplement (doi:10.21203/rs.3.rs-3161456/v1), 2023-07-19
Supplement: Supplementary file 1 [file 7f0fd213a8f828165f880fa8.docx]

# Supplemental Materials

**The effect of a political crisis on performance of community- and state-managed forests in Madagascar**

Rachel A. Neugarten1,2*, Ranaivo A. Rasolofoson3, Christopher B. Barrett4,5, Ghislain Vieilledent6, Amanda D. Rodewald2,1

1Department of Natural Resources and Environment, Cornell University, 226 Mann Drive, Ithaca NY 14853 USA

2Cornell Lab of Ornithology, Cornell University, 159 Sapsucker Woods Rd, Ithaca, NY 14850

3Duke University Marine Laboratory, Nicholas School of the Environment, Duke University, 135 Duke Marine Lab Rd, Beaufort, NC 28516

4Charles H. Dyson School of Applied Economics and Management, Cornell University, Ithaca, NY 14853-7801, USA

5Jeb E. Brooks School of Public Policy, Cornell University, Ithaca, NY 14853-7801, USA

6AMAP, Univ Montpellier, CIRAD, CNRS, INRAE, IRD, Montpellier, FRANCE

*Corresponding author

## S1. Test of parallel trends in the pre-crisis period

A key assumption of our analysis is that, in the absence of the political crisis, deforestation trends would have been similar in CFM and MNP areas (parallel trends assumption). The event study analysis controls for any difference in pre-crisis trends. Nonetheless, we tested this assumption by conducting a statistical test of significance of deforestation trends in CFM and matched MNP forest areas in the pre-crisis period. While this test was not necessary for our analysis, we were curious whether trends in the pre-crisis period were indeed similar in CFM and MNP. For the parallel trends test, we compared deforestation outcomes in CFM and matched MNP areas but focused only on the pre-crisis years (2005-2009) (Equation 3).

|  | (3) |
| --- | --- |

Where all variables are defined the same way as in Equation 2, above, except for *yeart* (*t*=2005-2009 only). We used all the same time-variant controls described above, as well as individual fixed effects for each forest grid cell, and clustered standard errors at the site level.

We found no significant difference in deforestation trends between CFM and MNP in the pre-crisis years (2005-2009) (Fig. S11, Table S9). Both CFM and MNP were negatively associated with deforestation in the pre-crisis period (that is, they experienced less deforestation over time). This gives us even greater confidence in our findings of relative performance during and after the crisis period. Fig. S11 indicates that deforestation in CFM was declining faster than in MNP in the pre-crisis period, which would create a downward bias in any estimated difference in effect between CFM and MNP during or after the crisis. This indicates that our estimated difference in performance in the post-crisis period are, if anything, conservative.

# Supplemental Figures


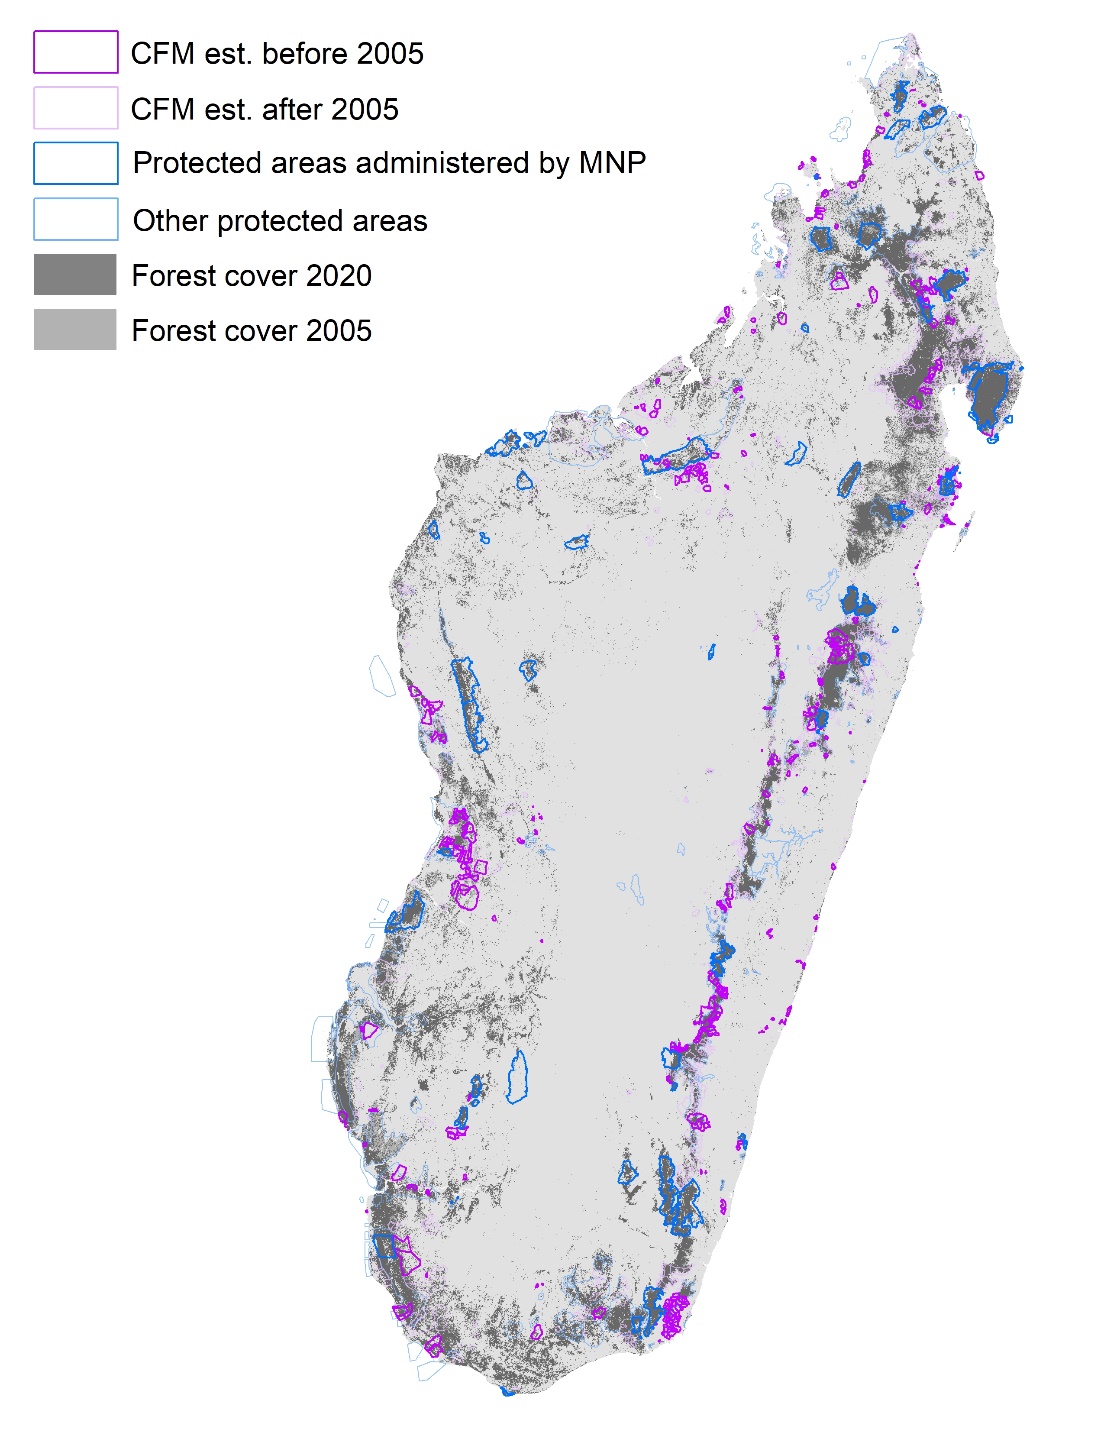


## Fig. S1. Community Managed Forests (CFM), protected areas administered by Madagascar National Parks (MNP) and other protected areas

Community Forest Management areas (CFM) established before 2005 (bright purple), protected areas administered by Madagascar National Parks (MNP) also established before 2005 (bright blue). CFM established after 2005 (faint purple) and protected areas administered by other agencies (faint blue) were not included in this analysis. Forest cover 2020 (dark gray), forest cover 2005 (medium gray) and all other land cover classes (grassland, shrubland, cropland, and urban) (light gray).


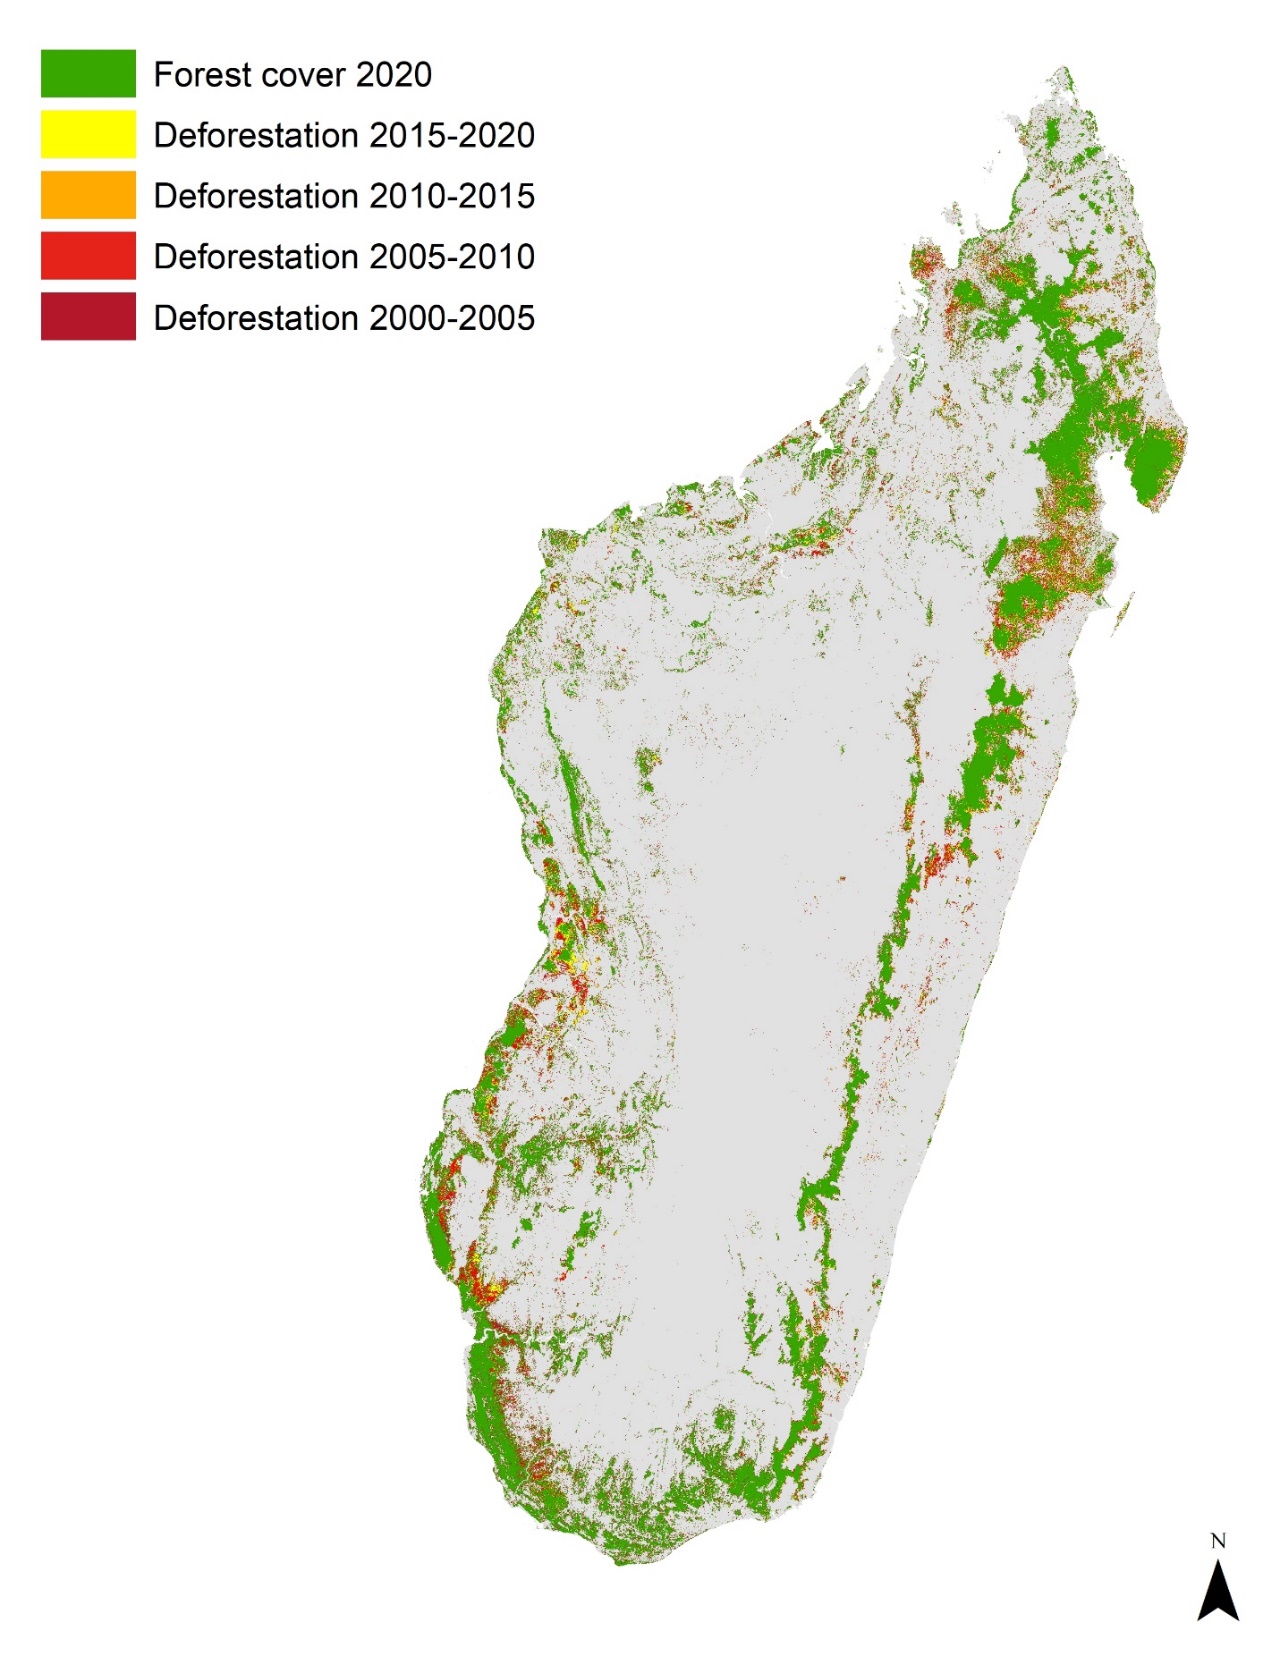


## Fig. S2. Map of deforestation in Madagascar 2000-2020

Map of Madagascar’s forest cover in 2020 (green) and deforestation 2000-2005 (dark red), 2005-2010 (light red), 2010-2015 (orange), and 2015-2020 (yellow)

a)
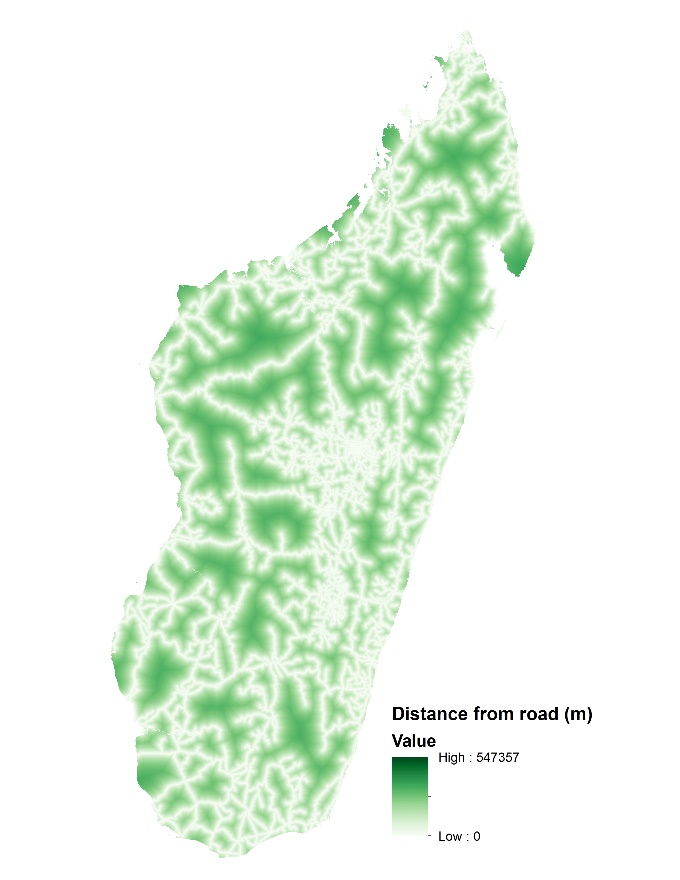
b)
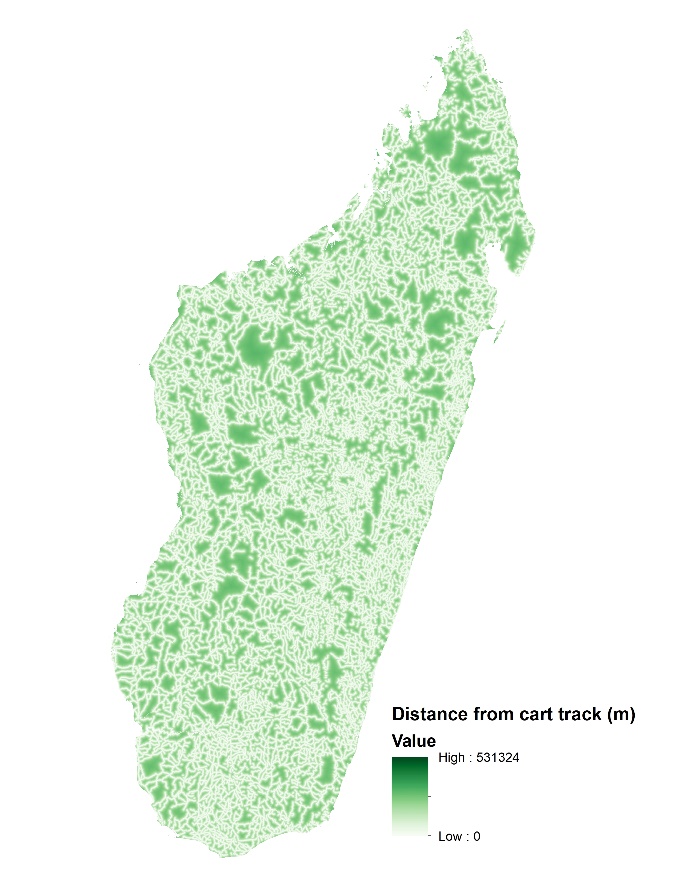


c)
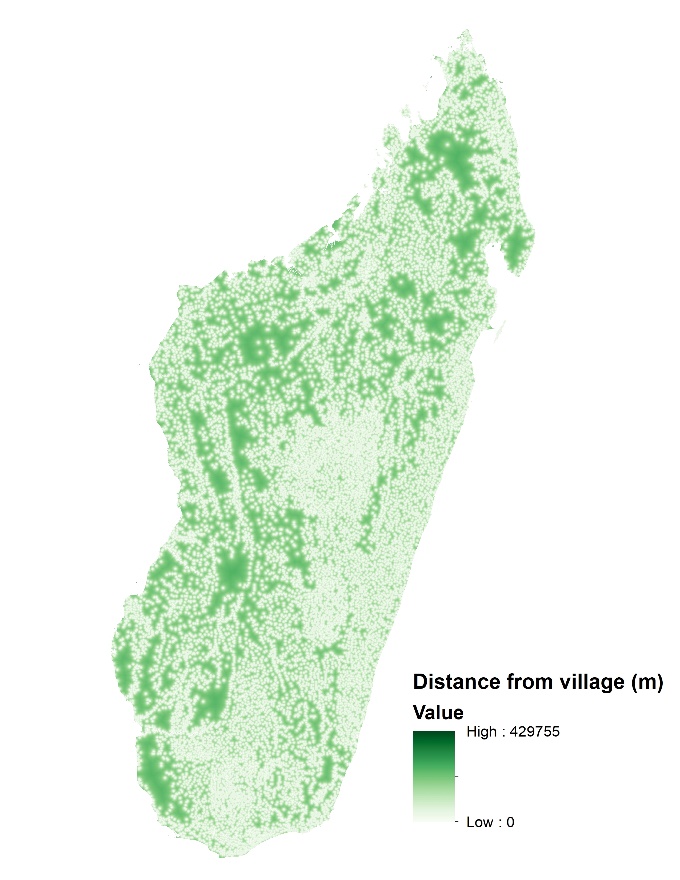
d)
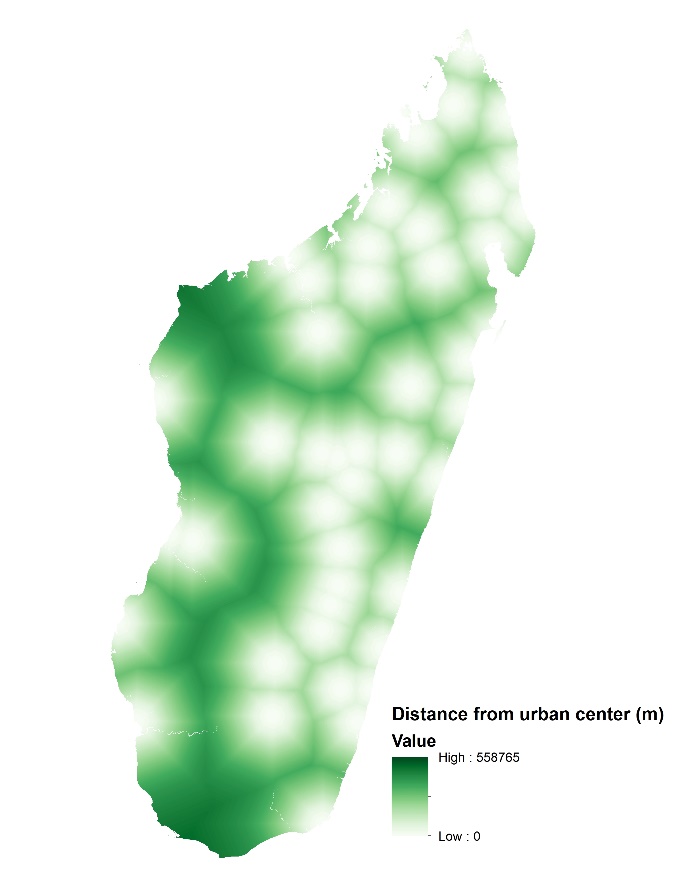


## Fig. S3a-d Maps of covariates used for matching

a) Distance from nearest road, b) distance from nearest cart track, c) distance from nearest village, and d) distance from urban center, all measured in meters.

e)
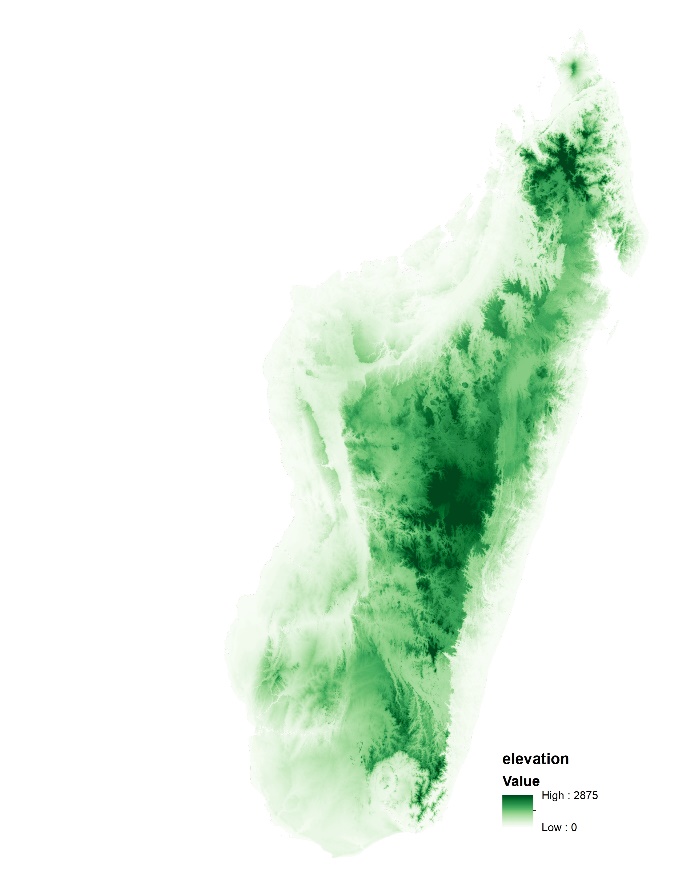
f)
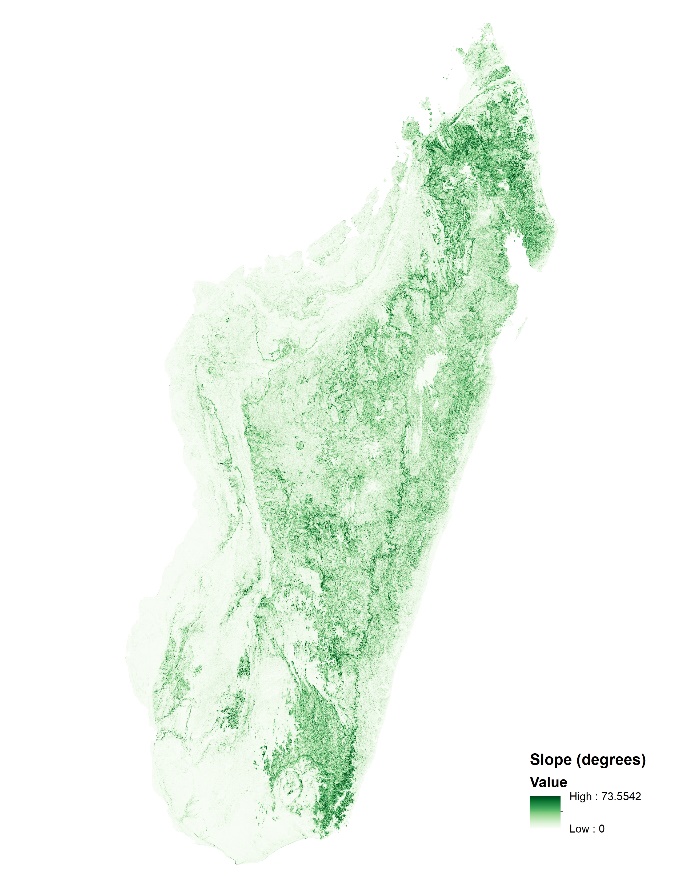
 g)
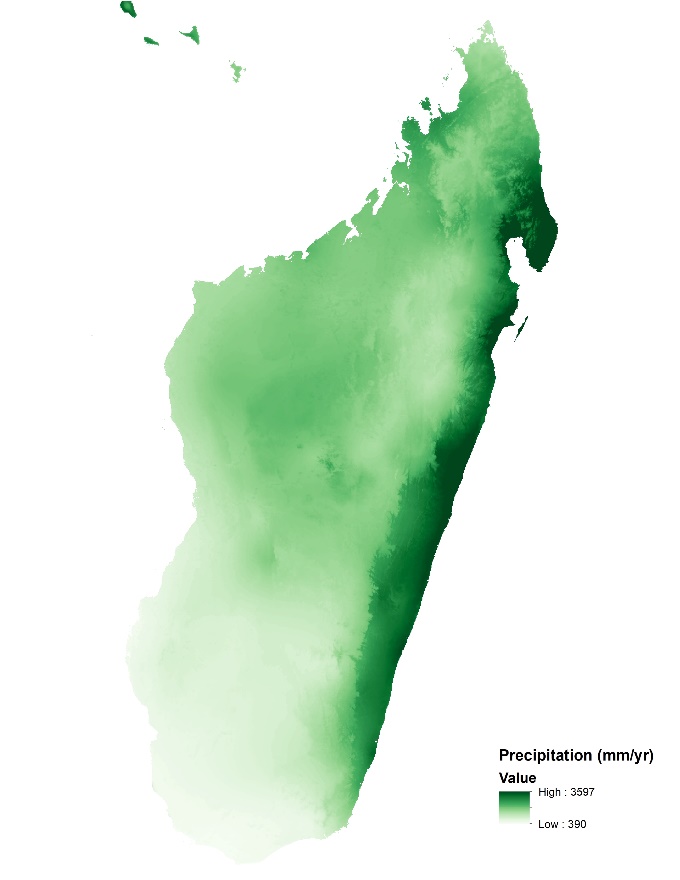
h)
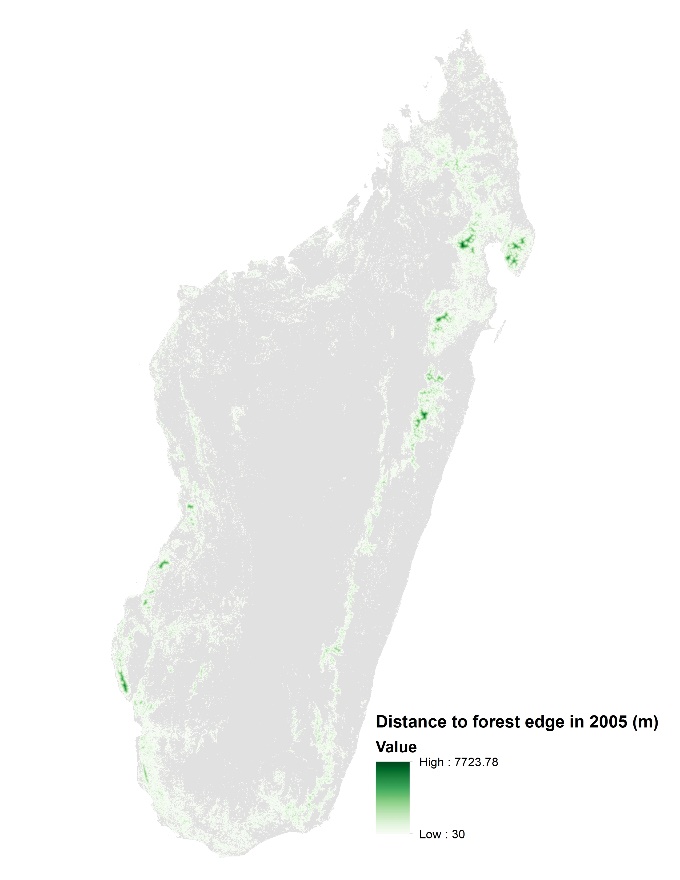


## Fig. S3e-h Maps of covariates used for matching, continued

e) Elevation (meters) f) slope (percent), g) annual average precipitation 1970-2000 (mm/year), and h) distance to forest edge in the baseline year (2005) (meters)

i)
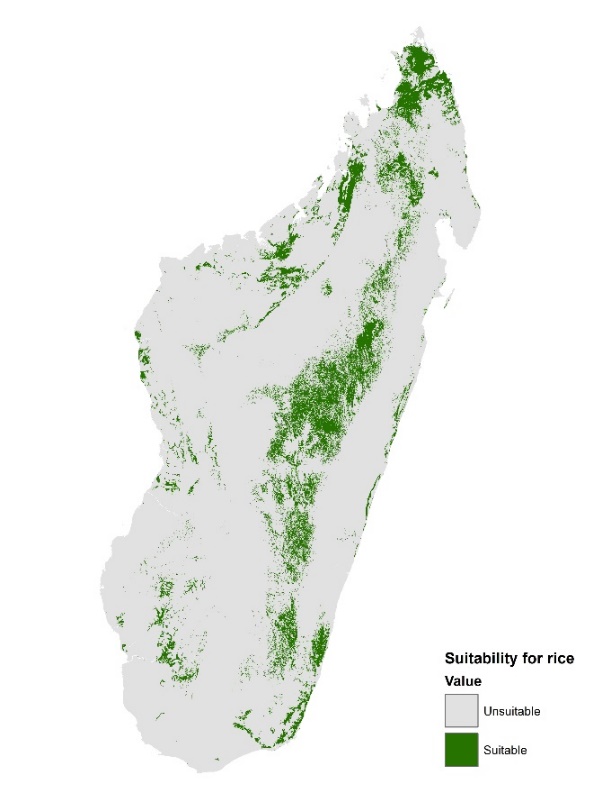
j)
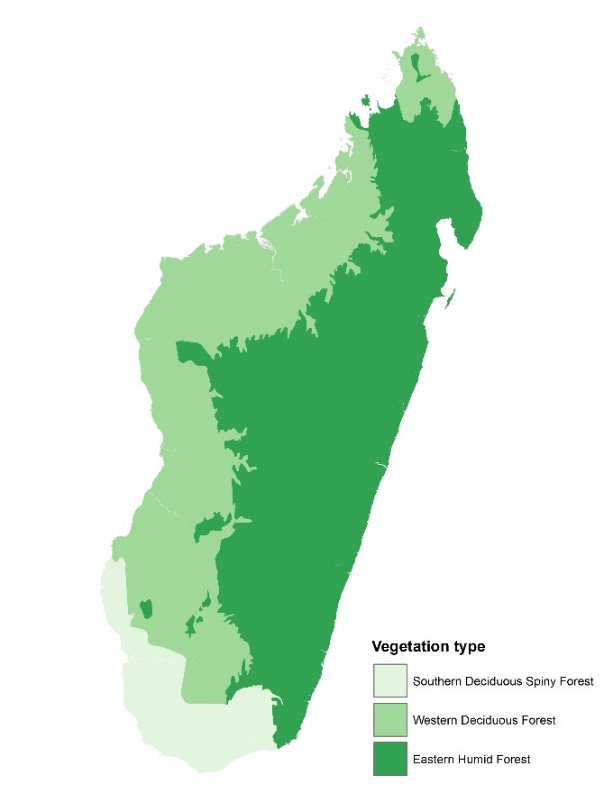


k)
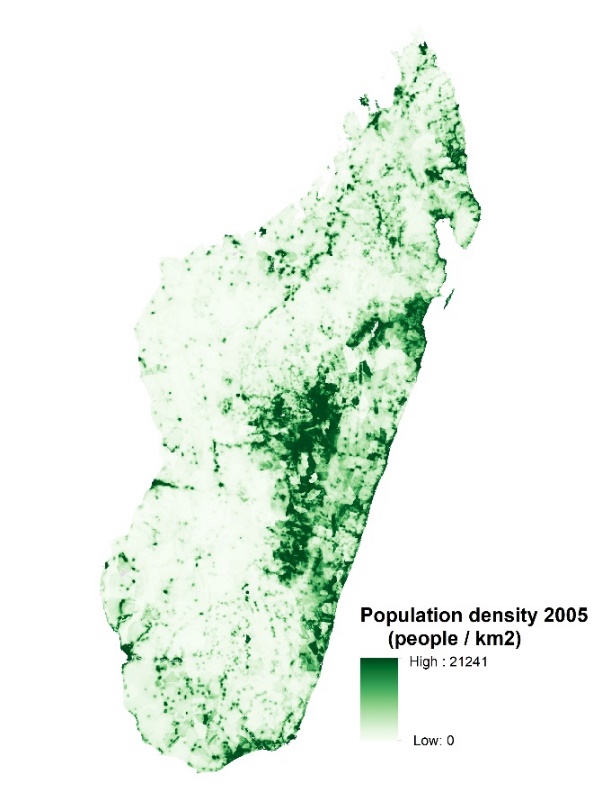


## Fig. S3i-k Maps of covariates used for matching, continued

i) Suitability for rice agriculture (index of suitability) j) vegetation zone (Eastern humid forest, western deciduous forest, or southern deciduous spiny forest), k) population density in the baseline year (2005) (people per square kilometer).

**
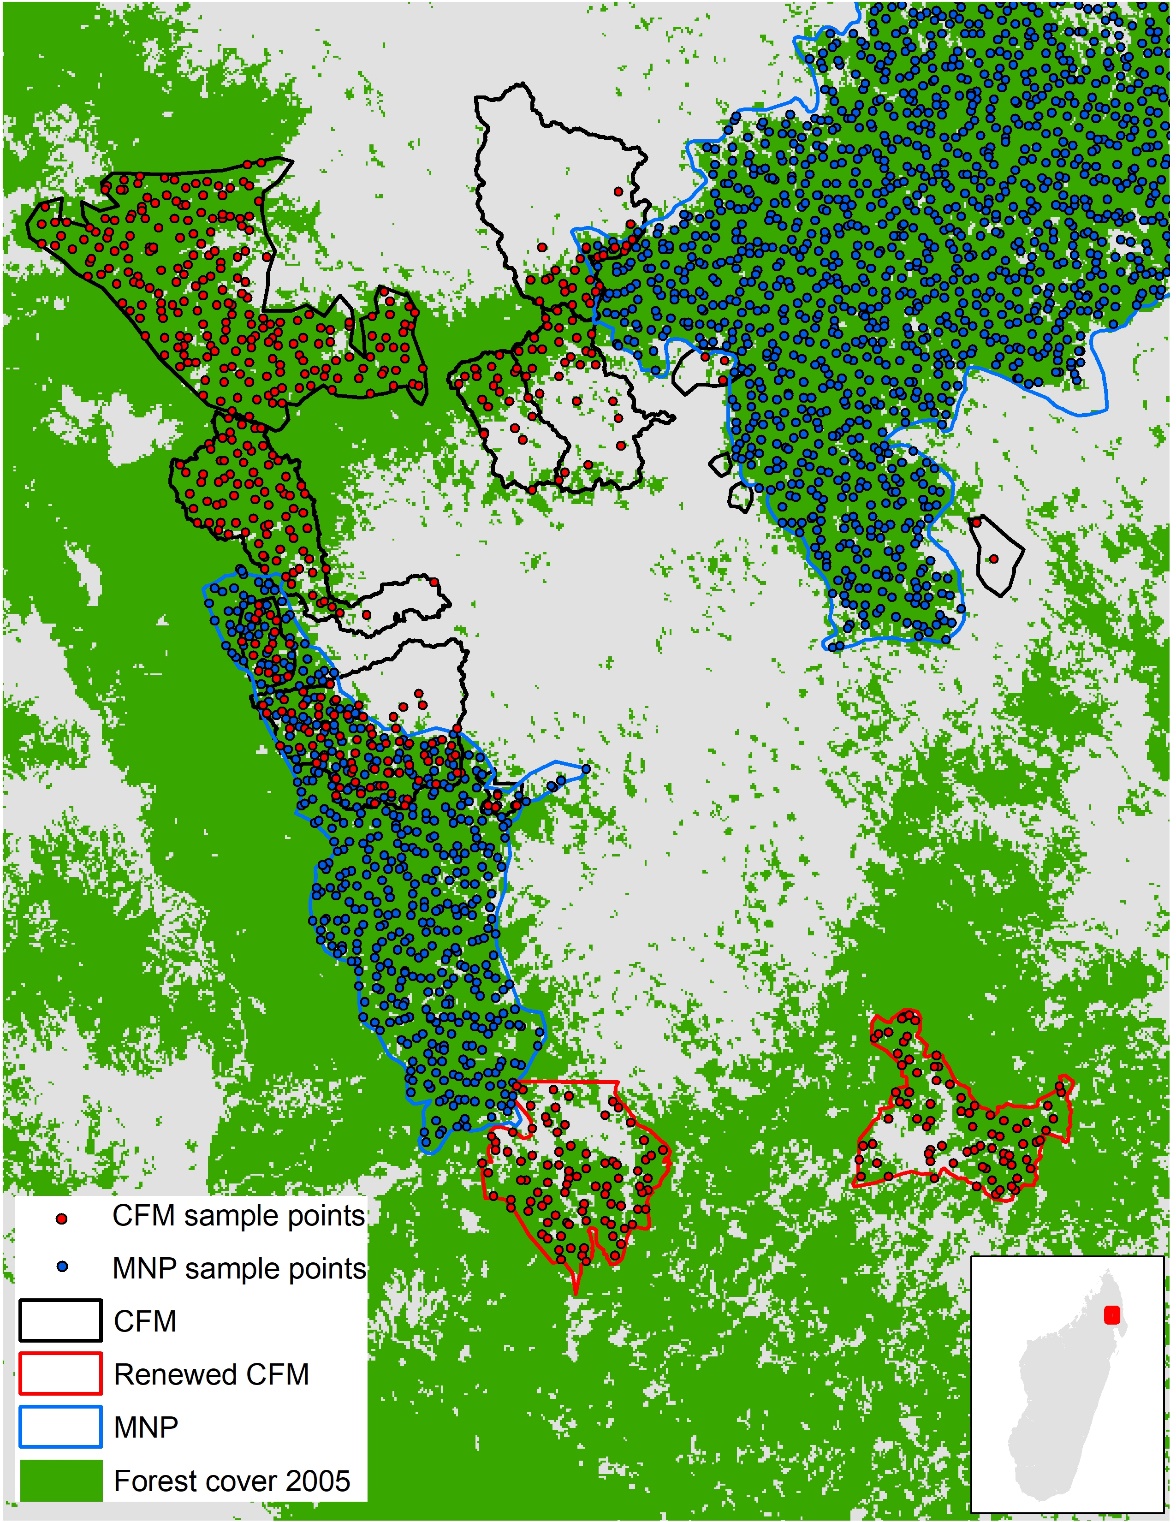
**

## Fig. S4. Example of sample points, before matching

Example of randomly selected (unmatched) sample points within CFM (red) and MNP (blue), baseline (2005) forest cover shown in green. Sample points in overlapping CFM and MNP areas (as shown in center of this map) were excluded from the analysis. Map shows a portion of northeastern Madagascar (Marojejy National Park in the upper right, Anjanaharibe-Sud national park in the center-left.)


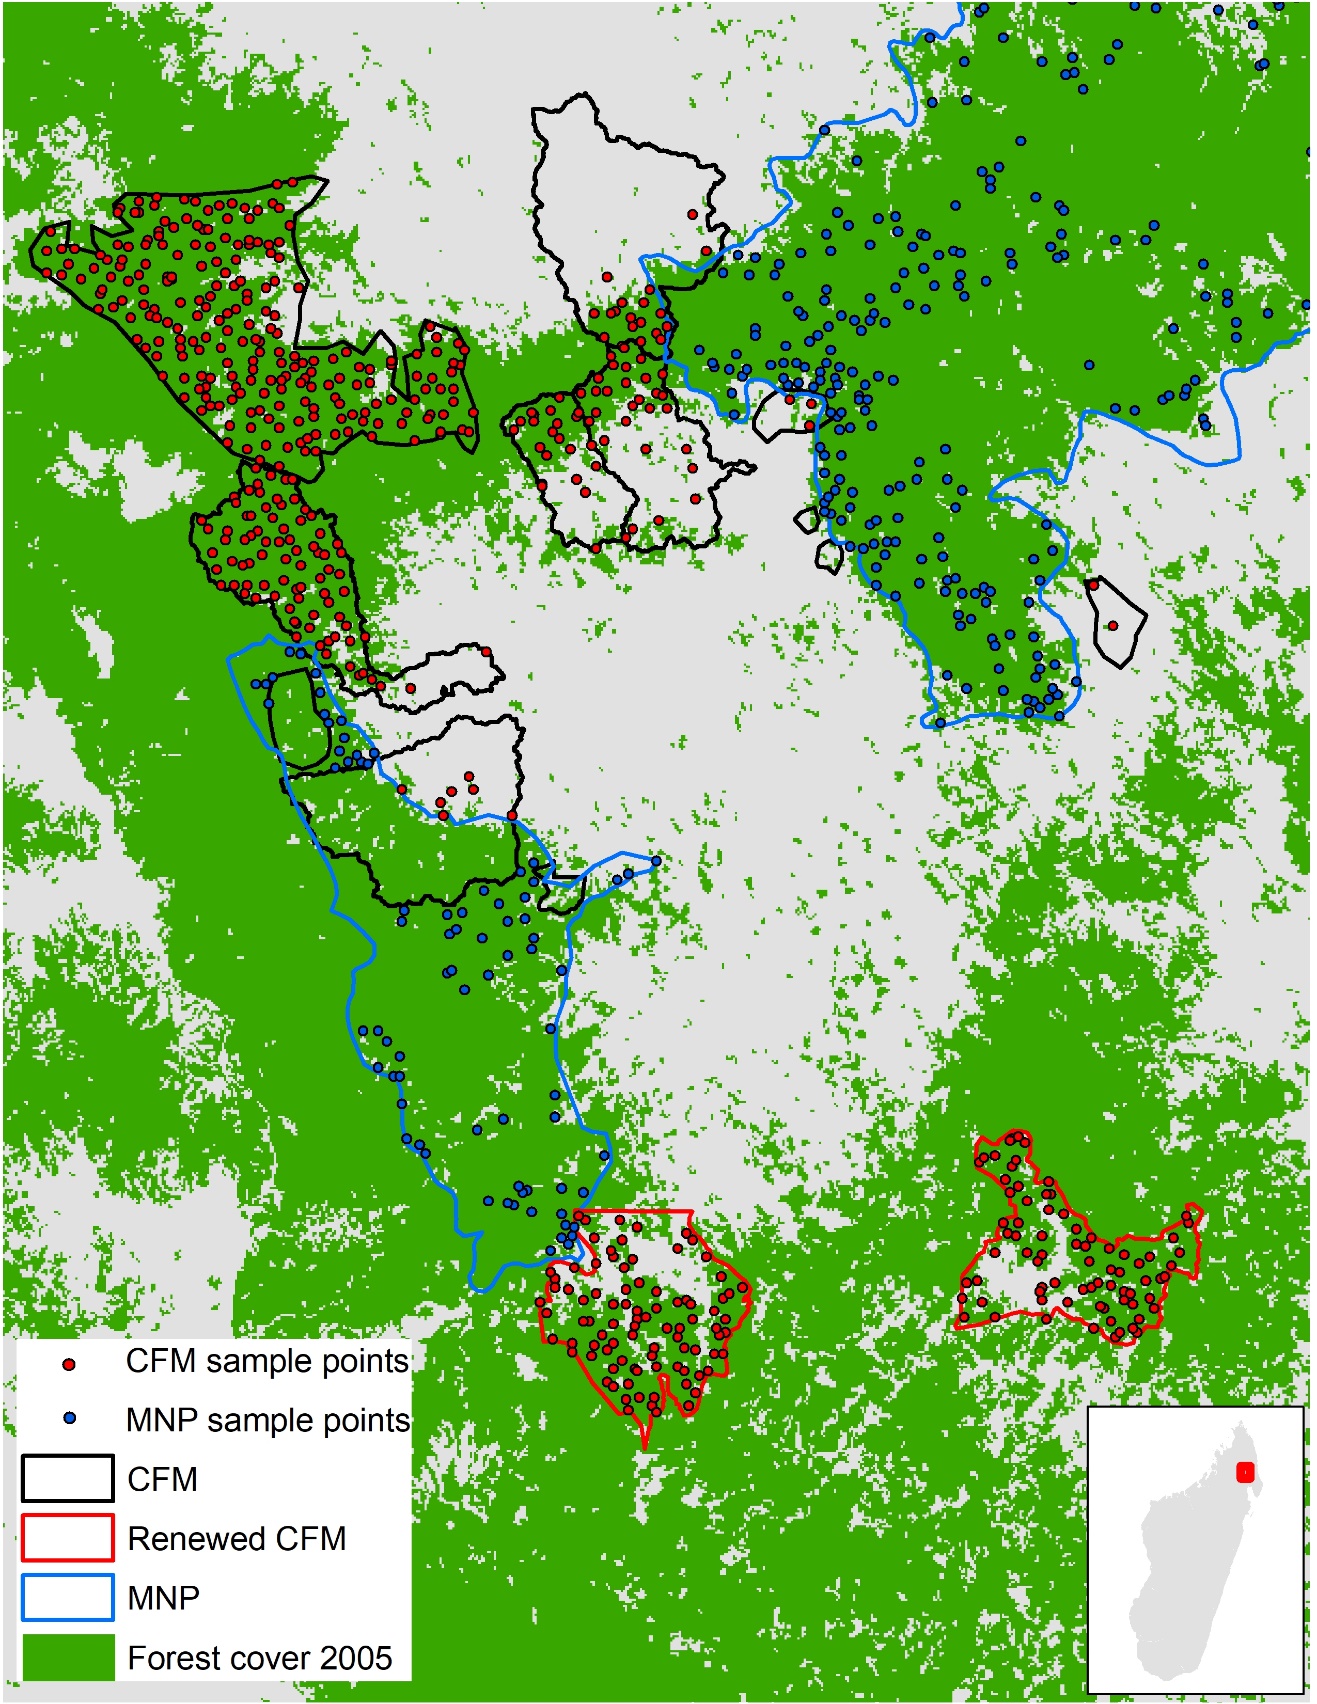


## Fig. S5. Example of sample points, after matching

Sample points within CFM (red) and matched points within MNP (blue) with baseline (2005) forest cover shown in green. All CFM sample points were retained, but only MNP sample points that were similar to CFM sample points were included, as these represent a more useful counterfactual.

a)


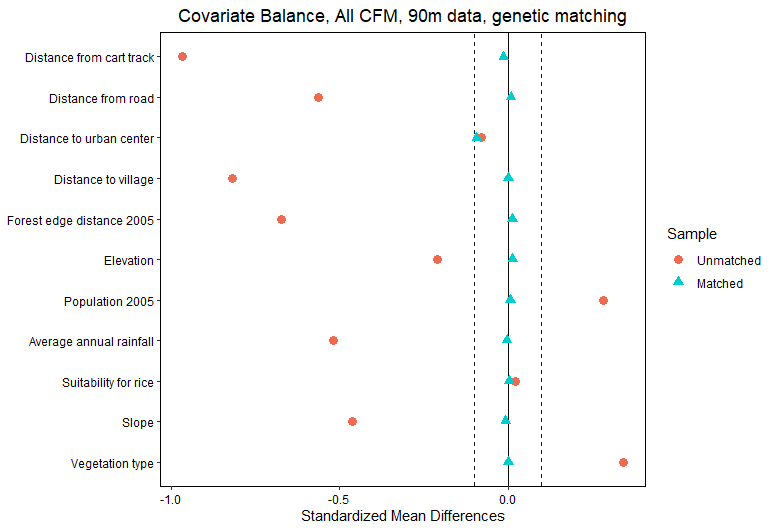


b)


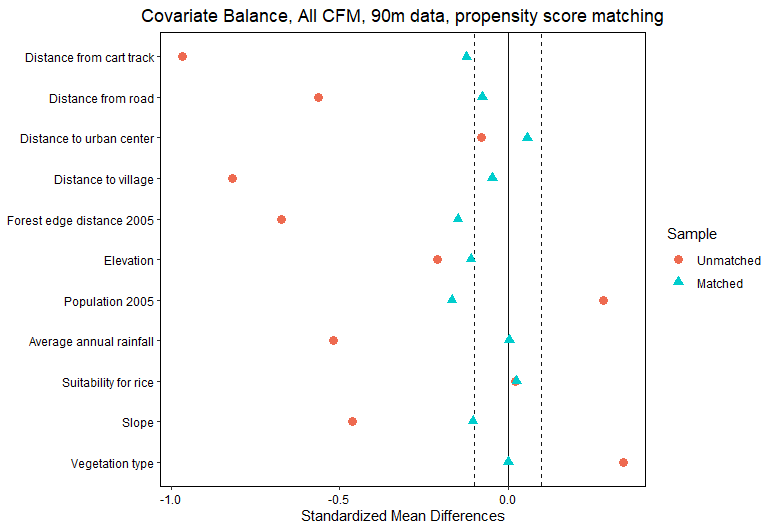


c)


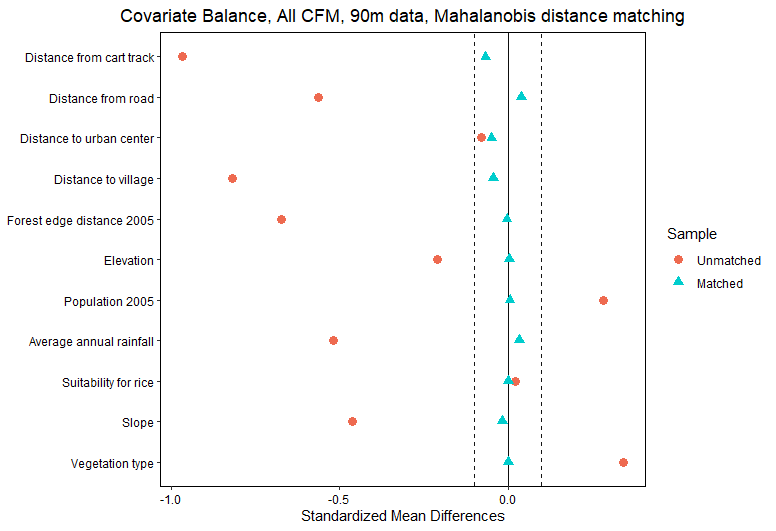


## Fig. S6. Match balance results

Standardized mean differences among covariates before matching (red circles) and after matching (blue triangles), using (a) genetic matching, (b) propensity scores, (b) and (c) Mahalanobis distance matching. Black dotted line indicates a standardized mean difference value of 0.1. In all cases, we performed 1:1 matching with replacement, with exact matching on vegetation type, using the “MatchIt” package in R. Results shown are for all CFM data at 90 m resolution; additional matching results (renewed CFM, 270 m) were similar (not shown).

a)
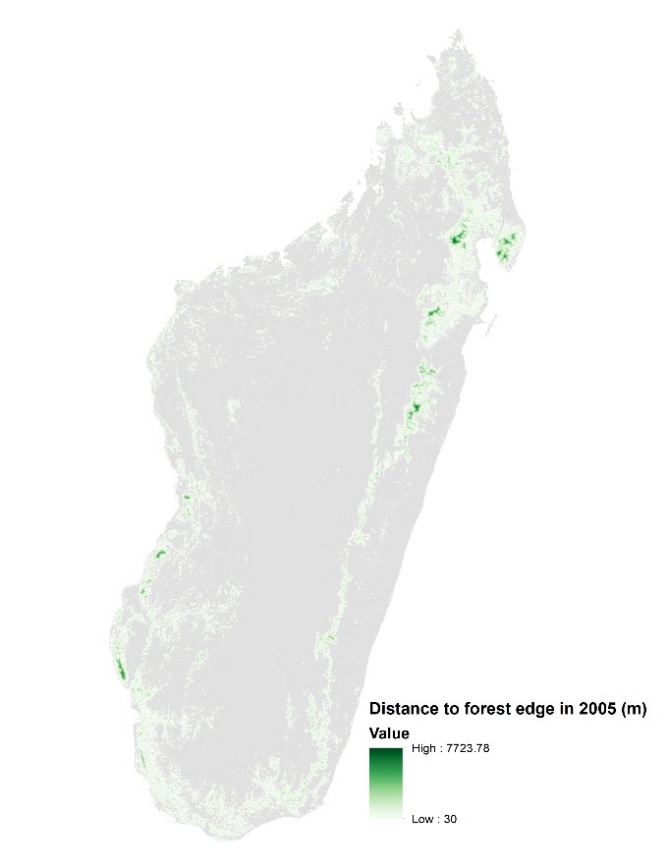
b)
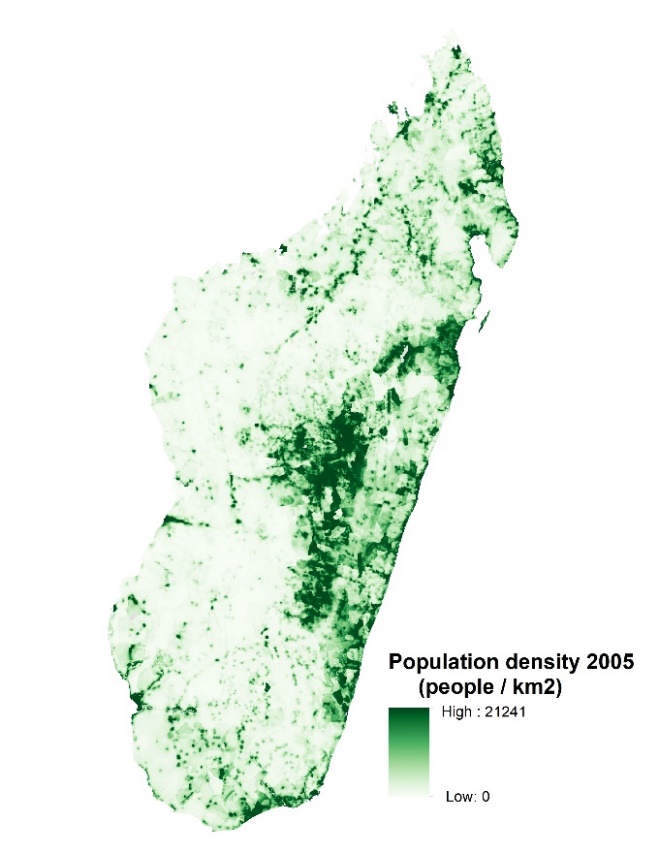


c)
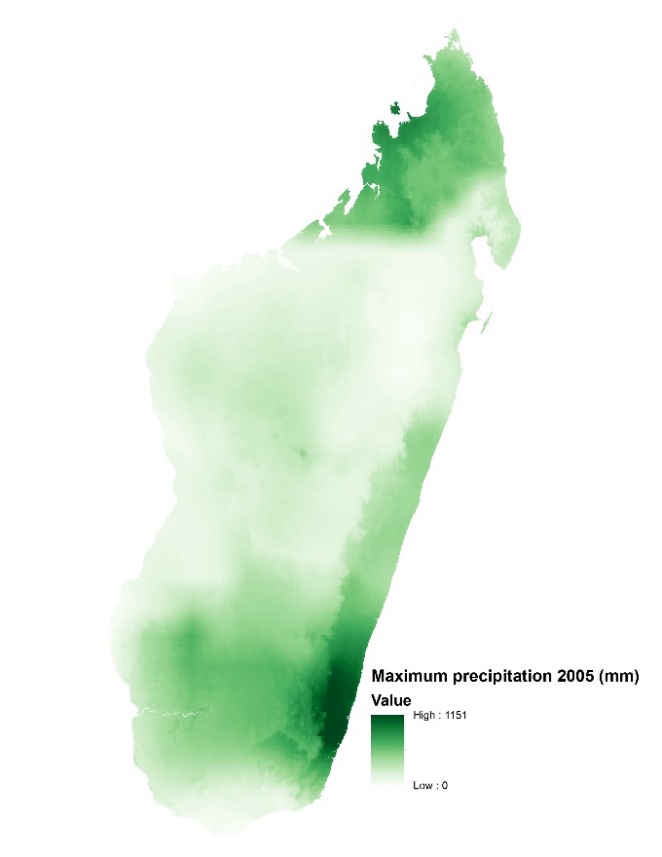
d)
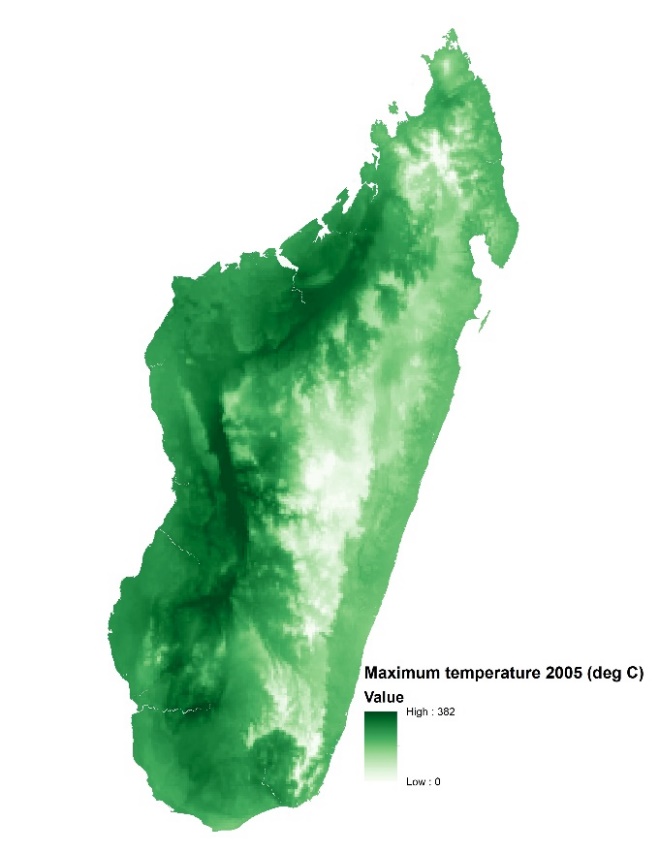


## Fig. S7a-d. Maps of time-variant covariates used in event study analysis

a) Distance to forest edge (m), b) population density, c) maximum accumulated precipitation (mm), d) maximum temperature (degrees C). Selected maps shown for 2005 only, but full time series includes 2005-2020.

e)
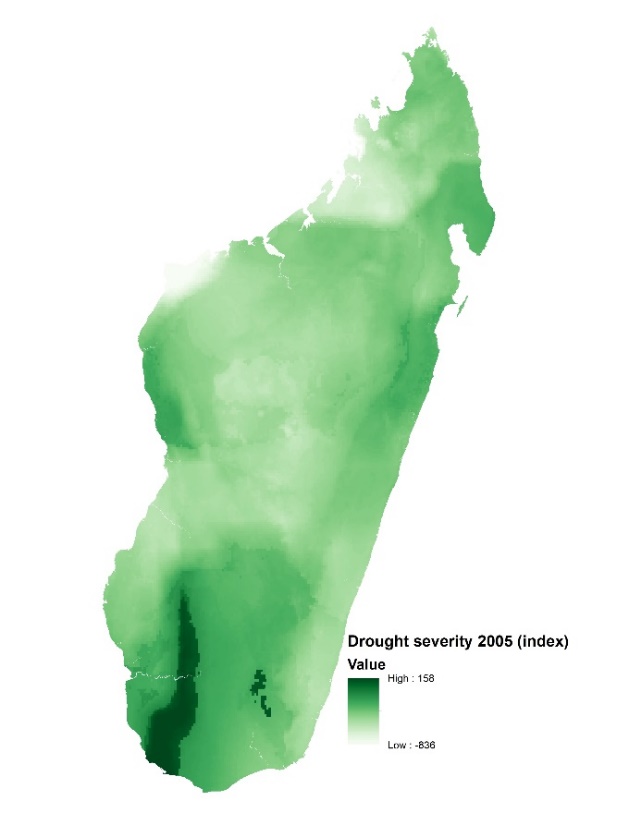
f)
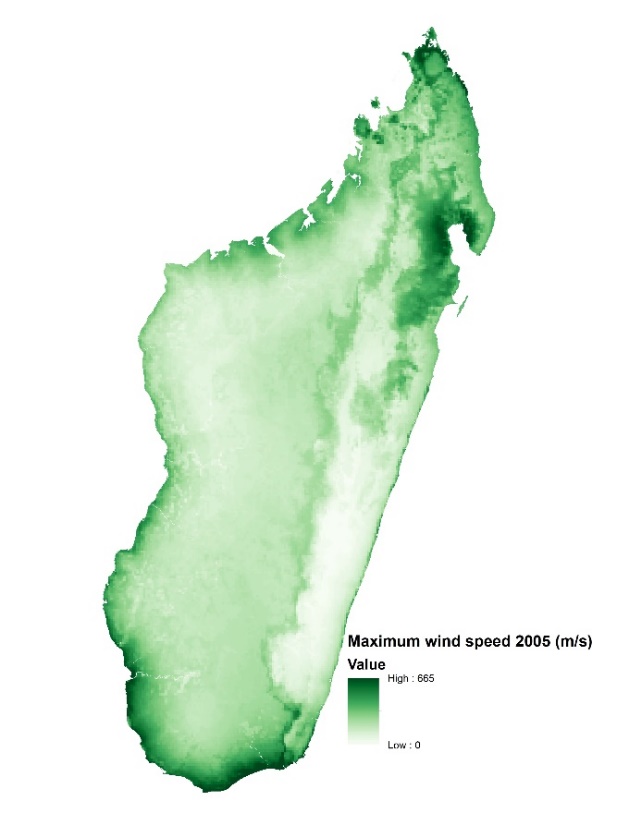


g)
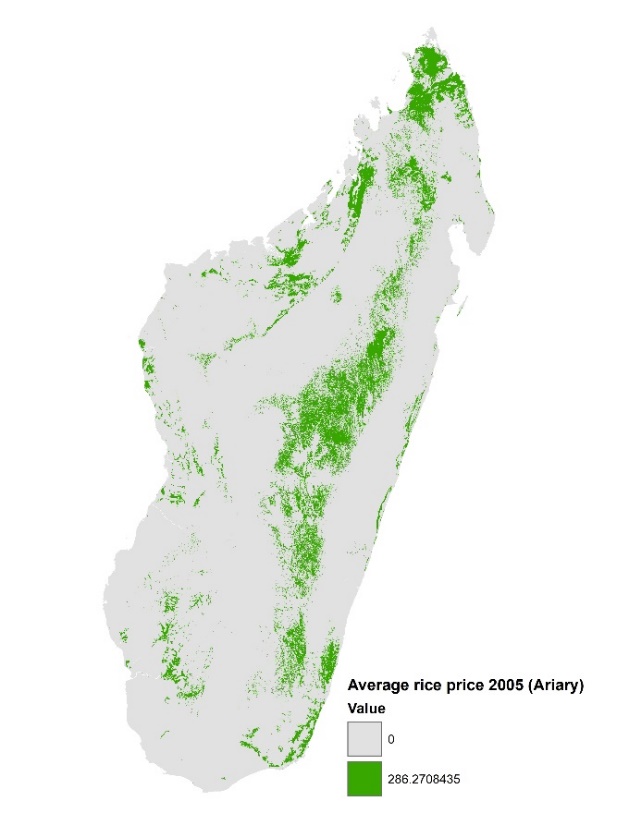
h)
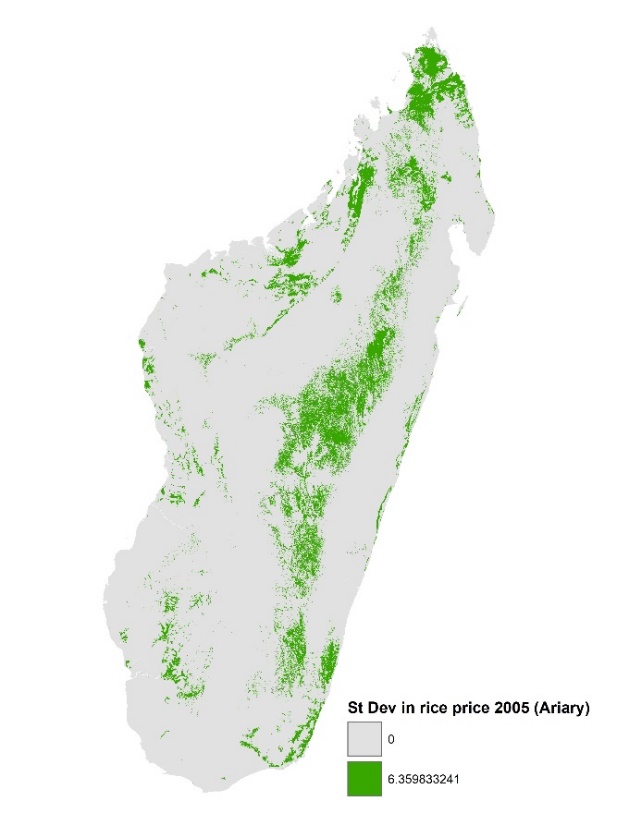


## Fig. S7a-d. Maps of time-variant covariates used in event study analysis (continued)

e) Drought severity (Palmer Drought Index), f) maximum wind speed, g) average annual rice price for suitable rice areas (Madagascar currency), h) standard deviation in annual rice price. Maps shown for 2005 only, but full time series includes 2005-2020.


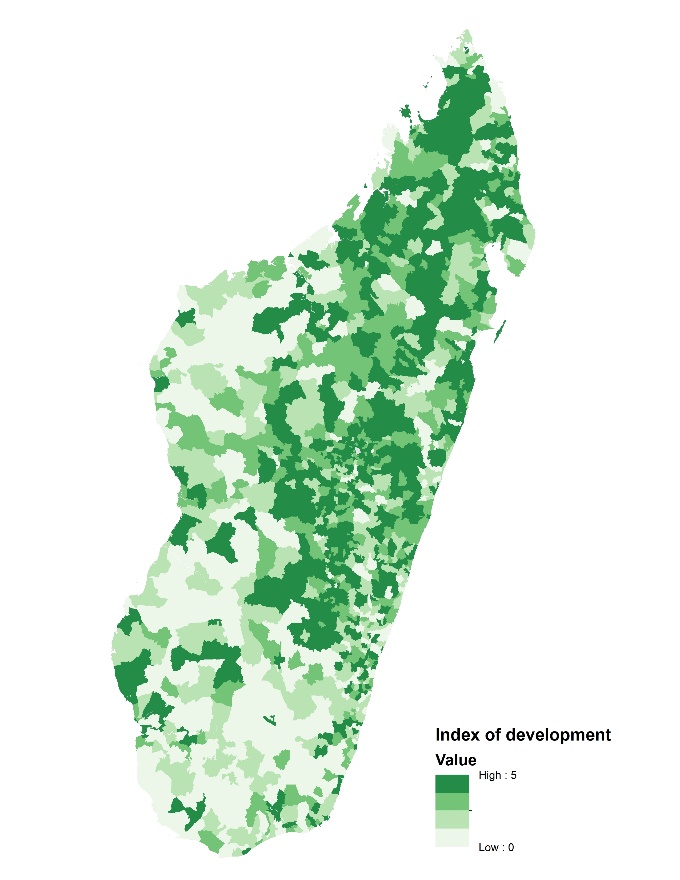

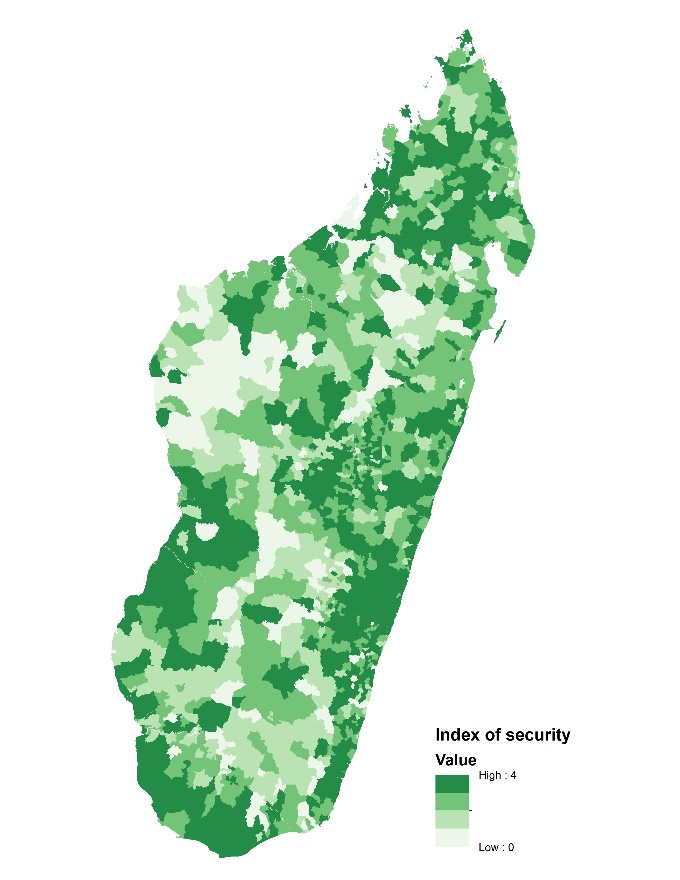


## Fig. S8. Maps of commune-level index of development (left) and index of level of security / risk of theft (right) used for exploring heterogeneity of effects

Development level is estimated using an index of material assets. Index of security is based on a single indicator, “Security conditions and risk of theft of property”. Both datasets provided by Wu Yang, Conservation International, and are based on 2007 commune-level data collected by Moser et al. 1.


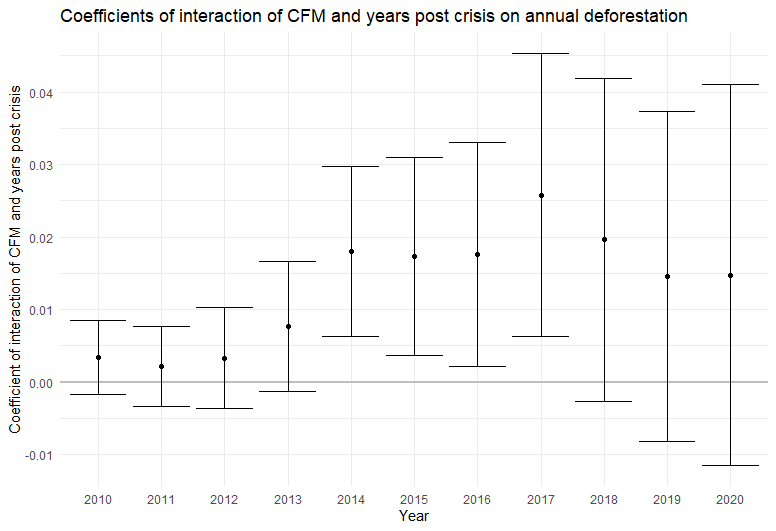


## Fig. S9. Event study model 1: Effect of interaction between CFM and years post crisis on annual deforestation

Coefficients of interaction between CFM and years post crisis (2010-2020) on annual deforestation (all CFM, 90 m resolution). Values greater than zero indicate a positive impact on deforestation (worse performance of CFM relative to MNP). Error bars indicate 90% confidence intervals, where standard errors are clustered at the site level. See Equation 2 in the main text (Methods section) for details.


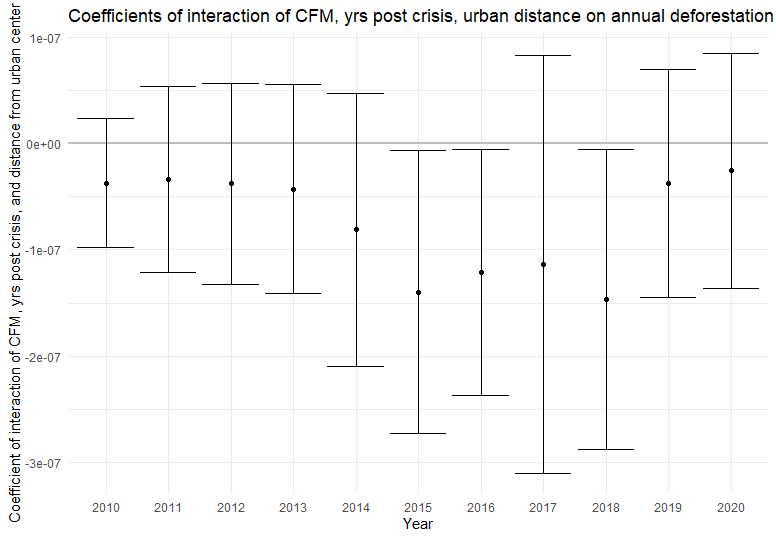


## Fig. S10. Effect of distance from urban centers

Effect of interaction of CFM, years post crisis, and distance from urban center. Points below zero indicate a negative association with deforestation. Thus, CFM further from urban centers had lower deforestation than CFM closer to urban centers, and the difference was statistically significant in 2015, 2016, and 2018. See Table S5 for model equation and more details.


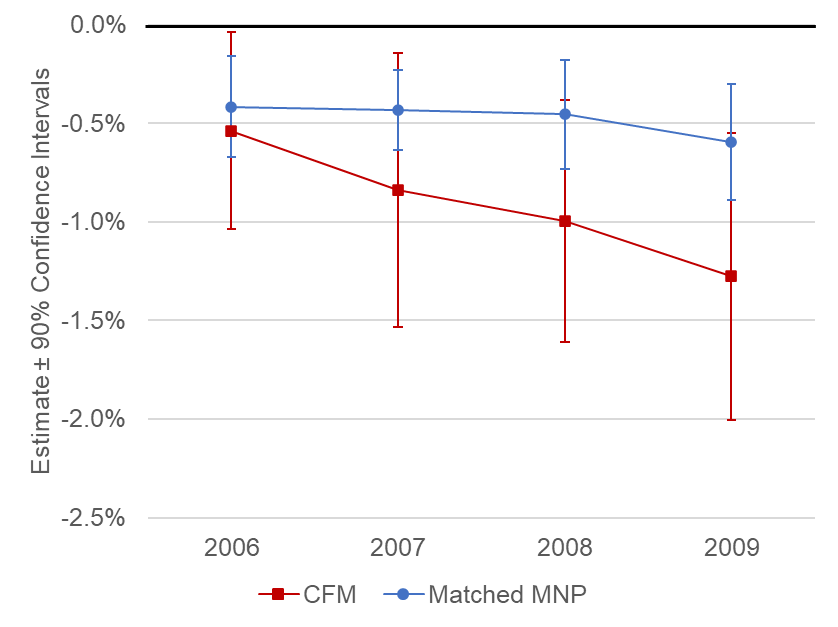


## Fig. S11. Results of test of parallel trends in the pre-crisis period

Effects of CFM (red squares) or MNP (blue circles) on annual deforestation, after matching and controlling for time-variant covariates. Estimates below zero indicate a negative association with deforestation (that is, less deforestation over time). Error bars indicate 90% confidence intervals.

# Supplemental Tables

## Table S1. Forest cover in Madagascar 2000-2020

Forest cover in protected areas administered by Madagascar National Parks and established prior to 2005 (MNP), Community Forest Management areas established before 2005 (CFM), CFM for which contracts were renewed (a sub-set of all CFM sites), other protected and unprotected forests (Other forest) and total national forest cover (Total). “Other forest” includes unprotected forests as well as CFM established after 2005 and protected areas administered by NGOs or agencies other than MNP. “Total” includes all categories. Forest area in each year is reported in hectares.

| year | MNP | CFM | (Renewed CFM) | Other forest | Total |
| --- | --- | --- | --- | --- | --- |
| 2000 | 1,213,627 | 499,526 | 257,502 | 8,168,202 | 9,881,355 |
| 2001 | 1,211,591 | 498,262 | 256,892 | 8,138,936 | 9,848,789 |
| 2002 | 1,209,917 | 495,908 | 255,860 | 8,098,391 | 9,804,216 |
| 2003 | 1,209,114 | 491,744 | 254,291 | 8,053,920 | 9,754,778 |
| 2004 | 1,207,543 | 490,422 | 253,577 | 8,021,703 | 9,719,669 |
| 2005 | 1,206,329 | 487,901 | 251,933 | 7,974,623 | 9,668,854 |
| 2006 | 1,205,279 | 483,110 | 248,518 | 7,918,200 | 9,606,589 |
| 2007 | 1,201,077 | 478,852 | 245,987 | 7,839,204 | 9,519,133 |
| 2008 | 1,199,491 | 475,333 | 244,109 | 7,779,495 | 9,454,320 |
| 2009 | 1,197,905 | 472,293 | 242,327 | 7,705,125 | 9,375,323 |
| 2010 | 1,194,180 | 468,103 | 239,833 | 7,650,085 | 9,312,368 |
| 2011 | 1,190,754 | 464,297 | 237,909 | 7,570,724 | 9,225,775 |
| 2012 | 1,187,099 | 461,221 | 236,495 | 7,509,951 | 9,158,271 |
| 2013 | 1,183,056 | 455,830 | 233,692 | 7,414,854 | 9,053,740 |
| 2014 | 1,174,892 | 444,351 | 228,366 | 7,248,476 | 8,867,719 |
| 2015 | 1,169,980 | 435,157 | 223,672 | 7,153,093 | 8,758,230 |
| 2016 | 1,162,485 | 426,345 | 218,622 | 7,047,973 | 8,636,803 |
| 2017 | 1,151,026 | 410,458 | 210,180 | 6,874,295 | 8,435,778 |
| 2018 | 1,140,665 | 398,568 | 204,350 | 6,739,595 | 8,278,828 |
| 2019 | 1,132,449 | 391,280 | 201,721 | 6,640,802 | 8,164,530 |
| 2020 | 1,127,322 | 385,697 | 199,358 | 6,558,665 | 8,071,684 |

## Table S2. Event study model 1 (all CFM, 90 m resolution)

Our first event study model takes the form (Equation 2, also described in the main text):

|  | (2) |
| --- | --- |

All variables are defined in the main text (Methods section).

OLS estimation, Dep. Var.: Annual deforestation

Observations: 372,032

Fixed-effects: UID: 23,252

Standard-errors: Clustered (cluster)

|  | Variable | estimate | std.error | statistic | p.value | signif |
| --- | --- | --- | --- | --- | --- | --- |
| 1 | Year | -7.79E-04 | 2.79E-04 | -2.796 | 0.005 | ** |
| 2 | 2010 | 2.29E-03 | 1.19E-03 | 1.92 | 0.056 | . |
| 3 | 2011 | 5.56E-03 | 1.77E-03 | 3.138 | 0.002 | ** |
| 4 | 2012 | 3.97E-03 | 1.29E-03 | 3.079 | 0.002 | ** |
| 5 | 2013 | 4.28E-03 | 1.65E-03 | 2.588 | 0.01 | * |
| 6 | 2014 | 7.34E-03 | 2.33E-03 | 3.149 | 0.002 | ** |
| 7 | 2015 | 6.61E-03 | 2.30E-03 | 2.871 | 0.004 | ** |
| 8 | 2016 | 7.95E-03 | 2.68E-03 | 2.967 | 0.003 | ** |
| 9 | 2017 | 1.45E-02 | 5.12E-03 | 2.827 | 0.005 | ** |
| 10 | 2018 | 1.56E-02 | 6.28E-03 | 2.48 | 0.014 | * |
| 11 | 2019 | 1.09E-02 | 3.49E-03 | 3.128 | 0.002 | ** |
| 12 | 2020 | 1.06E-02 | 5.27E-03 | 2.009 | 0.045 | * |
| 13 | Distance from forest edge | -5.32E-05 | 8.45E-06 | -6.296 | 0 | *** |
| 14 | Population density | -5.21E-06 | 4.07E-05 | -0.128 | 0.898 |  |
| 15 | Average rice price | -5.41E-09 | 3.57E-09 | -1.514 | 0.131 |  |
| 16 | Standard deviation in rice price | 2.16E-08 | 1.34E-08 | 1.615 | 0.107 |  |
| 17 | Drought severity (-) | -3.46E-06 | 1.94E-06 | -1.787 | 0.075 | . |
| 18 | Maximum precipitation | 5.20E-06 | 2.90E-06 | 1.792 | 0.074 | . |
| 19 | Maximum temperature | -6.50E-05 | 8.04E-05 | -0.808 | 0.42 |  |
| 20 | Maximum wind speed | -6.46E-06 | 1.22E-05 | -0.53 | 0.597 |  |
| 21 | CFM:Year | -1.69E-03 | 1.15E-03 | -1.477 | 0.141 |  |
| 22 | CFM:2010 | 3.13E-03 | 2.53E-03 | 1.236 | 0.217 |  |
| 23 | CFM:2011 | 1.22E-03 | 2.99E-03 | 0.407 | 0.684 |  |
| 24 | CFM:2012 | 3.18E-03 | 3.56E-03 | 0.895 | 0.372 |  |
| 25 | CFM:2013 | 7.28E-03 | 4.59E-03 | 1.587 | 0.113 |  |
| 26 | CFM:2014 | 1.79E-02 | 5.94E-03 | 3.018 | 0.003 | ** |
| 27 | CFM:2015 | 1.70E-02 | 6.91E-03 | 2.468 | 0.014 | * |
| 28 | CFM:2016 | 1.75E-02 | 7.84E-03 | 2.237 | 0.026 | * |
| 29 | CFM:2017 | 2.43E-02 | 1.02E-02 | 2.377 | 0.018 | * |
| 30 | CFM:2018 | 1.84E-02 | 1.15E-02 | 1.6 | 0.11 |  |
| 31 | CFM:2019 | 1.45E-02 | 1.15E-02 | 1.256 | 0.21 |  |
| 32 | CFM:2020 | 1.48E-02 | 1.33E-02 | 1.119 | 0.264 |  |

Signif. codes: 0 '***' 0.001 '**' 0.01 '*' 0.05 '.' 0.1 ' ' 1

RMSE: 0.065427 Adj. R2: 0.024156

Within R2: 0.017623

## Table S3. Event study model 1 variation (renewed CFM, 90 m resolution)

This model is identical to the model described above, but the sample of CFM forest pixels were selected only from a sub-set of CFM for which contracts were renewed. Statistical matching was performed separately and the same way as described above, so the matched dataset in this case reflects MNP forest pixels that are similar to renewed CFM forest pixels. The equation is identical to Equation 2. All below model variations were also performed for this renewed CFM dataset, with very similar results (not shown).

Observations: 380,352

Fixed-effects: UID: 23,772

Standard-errors: Clustered (cluster)

| Variable | estimate | std.error | statistic | p.value | signif |
| --- | --- | --- | --- | --- | --- |
| Year | -3.26E-04 | 3.61E-04 | -0.904 | 0.367 |  |
| 2010 | -5.67E-04 | 1.37E-03 | -0.414 | 0.680 |  |
| 2011 | 2.64E-03 | 2.37E-03 | 1.114 | 0.267 |  |
| 2012 | 8.03E-04 | 2.10E-03 | 0.383 | 0.703 |  |
| 2013 | 1.21E-03 | 2.49E-03 | 0.485 | 0.629 |  |
| 2014 | 2.47E-03 | 2.63E-03 | 0.941 | 0.348 |  |
| 2015 | 2.43E-03 | 2.67E-03 | 0.908 | 0.365 |  |
| 2016 | 3.63E-03 | 3.82E-03 | 0.949 | 0.344 |  |
| 2017 | 6.21E-03 | 4.66E-03 | 1.333 | 0.185 |  |
| 2018 | 8.53E-03 | 5.69E-03 | 1.499 | 0.136 |  |
| 2019 | 5.68E-03 | 4.90E-03 | 1.160 | 0.248 |  |
| 2020 | 3.66E-03 | 5.69E-03 | 0.643 | 0.521 |  |
| Distance from forest edge | -4.60E-05 | 1.02E-05 | -4.529 | 0.000 | *** |
| Population density | -4.33E-05 | 8.93E-05 | -0.485 | 0.629 |  |
| Average rice price | -4.11E-09 | 5.03E-09 | -0.817 | 0.415 |  |
| Standard deviation in rice price | 3.70E-08 | 2.74E-08 | 1.353 | 0.178 |  |
| Drought severity (-) | -5.74E-06 | 3.10E-06 | -1.854 | 0.066 | . |
| Maximum precipitation | 6.39E-06 | 3.93E-06 | 1.626 | 0.106 |  |
| Maximum temperature | -7.29E-05 | 7.62E-05 | -0.957 | 0.340 |  |
| Maximum wind speed | -1.44E-05 | 1.42E-05 | -1.019 | 0.310 |  |
| CFM:Year | -2.18E-03 | 1.63E-03 | -1.335 | 0.184 |  |
| CFM:2010 | 5.47E-03 | 3.55E-03 | 1.541 | 0.125 |  |
| CFM:2011 | 3.03E-03 | 3.97E-03 | 0.763 | 0.447 |  |
| CFM:2012 | 4.97E-03 | 4.81E-03 | 1.034 | 0.303 |  |
| CFM:2013 | 1.07E-02 | 6.31E-03 | 1.690 | 0.093 | . |
| CFM:2014 | 1.97E-02 | 7.44E-03 | 2.643 | 0.009 | ** |
| CFM:2015 | 1.98E-02 | 8.64E-03 | 2.293 | 0.023 | * |
| CFM:2016 | 2.35E-02 | 1.04E-02 | 2.254 | 0.026 | * |
| CFM:2017 | 3.07E-02 | 1.18E-02 | 2.604 | 0.010 | * |
| CFM:2018 | 2.45E-02 | 1.46E-02 | 1.680 | 0.095 | . |
| CFM:2019 | 1.65E-02 | 1.64E-02 | 1.003 | 0.318 |  |
| CFM:2020 | 1.77E-02 | 1.83E-02 | 0.970 | 0.334 |  |

Signif. codes: 0 '***' 0.001 '**' 0.01 '*' 0.05 '.' 0.1 ' ' 1

RMSE: 0.062737 Adj. R2: 0.022307

Within R2: 0.016042

## Table S4. Event study model 1 variation (all CFM, 270 m resolution)

This model is identical to Event Study Model 1, above, but all analyses (sampling, statistical matching, and event study analysis) were performed at a coarser spatial resolution (270 m, instead of 90 m). The model equation is identical to Equation 2. All of the below variations on the model were also performed, with very similar results (not shown).

OLS estimation, Dep. Var.: Annual deforestation

Observations: 370,272

Fixed-effects: UID: 23,142

Standard-errors: Clustered (cluster)

| Variable | estimate | std.error | statistic | p.value | signif |
| --- | --- | --- | --- | --- | --- |
| Year | -5.85E-04 | 1.94E-04 | -3.019 | 0.003 | ** |
| 2010 | 2.33E-03 | 1.31E-03 | 1.778 | 0.076 | . |
| 2011 | 2.84E-03 | 1.19E-03 | 2.392 | 0.017 | * |
| 2012 | 2.10E-03 | 9.69E-04 | 2.165 | 0.031 | * |
| 2013 | 3.73E-03 | 1.60E-03 | 2.328 | 0.020 | * |
| 2014 | 6.90E-03 | 2.32E-03 | 2.975 | 0.003 | ** |
| 2015 | 4.97E-03 | 1.57E-03 | 3.159 | 0.002 | ** |
| 2016 | 5.36E-03 | 2.29E-03 | 2.335 | 0.020 | * |
| 2017 | 1.08E-02 | 4.74E-03 | 2.286 | 0.023 | * |
| 2018 | 8.64E-03 | 2.80E-03 | 3.084 | 0.002 | ** |
| 2019 | 9.92E-03 | 3.44E-03 | 2.885 | 0.004 | ** |
| 2020 | 6.41E-03 | 3.01E-03 | 2.131 | 0.034 | * |
| Distance from forest edge | -5.34E-05 | 7.62E-06 | -7.001 | 0.000 | *** |
| Population density | 1.04E-05 | 3.62E-05 | 0.286 | 0.775 |  |
| Average rice price | 1.43E-09 | 5.54E-09 | 0.258 | 0.797 |  |
| Standard deviation in rice price | 2.84E-09 | 2.13E-08 | 0.133 | 0.894 |  |
| Drought severity (-) | -2.92E-06 | 1.76E-06 | -1.658 | 0.098 | . |
| Maximum precipitation | 4.99E-06 | 2.89E-06 | 1.724 | 0.086 | . |
| Maximum temperature | -9.89E-05 | 6.62E-05 | -1.495 | 0.136 |  |
| Maximum wind speed | -1.39E-06 | 1.16E-05 | -0.120 | 0.905 |  |
| CFM:Year | -1.91E-03 | 1.06E-03 | -1.805 | 0.072 | . |
| CFM:2010 | 2.76E-03 | 2.30E-03 | 1.199 | 0.231 |  |
| CFM:2011 | 3.64E-03 | 2.40E-03 | 1.517 | 0.130 |  |
| CFM:2012 | 4.98E-03 | 3.17E-03 | 1.573 | 0.117 |  |
| CFM:2013 | 8.73E-03 | 4.21E-03 | 2.073 | 0.039 | * |
| CFM:2014 | 1.89E-02 | 5.56E-03 | 3.406 | 0.001 | *** |
| CFM:2015 | 1.84E-02 | 6.10E-03 | 3.015 | 0.003 | ** |
| CFM:2016 | 1.95E-02 | 7.23E-03 | 2.703 | 0.007 | ** |
| CFM:2017 | 2.68E-02 | 9.60E-03 | 2.792 | 0.006 | ** |
| CFM:2018 | 2.42E-02 | 9.57E-03 | 2.524 | 0.012 | * |
| CFM:2019 | 1.59E-02 | 1.08E-02 | 1.469 | 0.143 |  |
| CFM:2020 | 1.83E-02 | 1.18E-02 | 1.553 | 0.121 |  |

Signif. codes: 0 '***' 0.001 '**' 0.01 '*' 0.05 '.' 0.1 ' ' 1

RMSE: 0.046067 Adj. R2: 0.065911

Within R2: 0.032132

## Table S5. Event study model 2 (interaction term for distance from urban center) (all CFM, 90 m)

This variation on the event study model explores heterogeneity of outcomes based on distance from cities, by including an interaction term for distance from urban center:

|  | (4) |
| --- | --- |

All variables are defined as above, the new variable, “*UrbanDistance*” indicates the distance, in meters, of each forest grid cell (observation) from the nearest city2. Also see Figure S8.

Results (all CFM, 90 m data):

OLS estimation, Dep. Var.: Annual deforestation

Observations: 372,032

Fixed-effects: UID: 23,252

Standard-errors: Clustered (cluster)

| Variable | estimate | std.error | statistic | p.value | signif |
| --- | --- | --- | --- | --- | --- |
| Year | -7.77E-04 | 2.71E-04 | -2.868 | 0.004 | ** |
| 2010 | 1.48E-03 | 1.11E-03 | 1.339 | 0.181 |  |
| 2011 | 5.97E-03 | 2.26E-03 | 2.644 | 0.009 | ** |
| 2012 | 4.03E-03 | 1.24E-03 | 3.245 | 0.001 | ** |
| 2013 | 4.70E-03 | 1.74E-03 | 2.698 | 0.007 | ** |
| 2014 | 7.21E-03 | 2.19E-03 | 3.294 | 0.001 | ** |
| 2015 | 5.82E-03 | 2.31E-03 | 2.517 | 0.012 | * |
| 2016 | 8.32E-03 | 2.83E-03 | 2.939 | 0.004 | ** |
| 2017 | 2.06E-02 | 7.73E-03 | 2.668 | 0.008 | ** |
| 2018 | 1.49E-02 | 6.11E-03 | 2.445 | 0.015 | * |
| 2019 | 1.12E-02 | 3.87E-03 | 2.902 | 0.004 | ** |
| 2020 | 1.18E-02 | 6.14E-03 | 1.920 | 0.056 | . |
| Distance from forest edge | -5.23E-05 | 8.29E-06 | -6.316 | 0.000 | *** |
| Population density | -6.02E-07 | 3.91E-05 | -0.015 | 0.988 |  |
| Average rice price | -6.32E-09 | 3.44E-09 | -1.835 | 0.067 | . |
| Standard deviation in rice price | 2.35E-08 | 1.35E-08 | 1.743 | 0.082 | . |
| Drought severity (-) | -3.42E-06 | 1.97E-06 | -1.735 | 0.084 | . |
| Maximum precipitation | 4.32E-06 | 2.89E-06 | 1.498 | 0.135 |  |
| Maximum temperature | -4.90E-05 | 9.11E-05 | -0.538 | 0.591 |  |
| Maximum wind speed | -2.55E-06 | 1.25E-05 | -0.204 | 0.838 |  |
| CFM:Year | -1.70E-03 | 1.16E-03 | -1.474 | 0.141 |  |
| CFM:2010 | 5.44E-03 | 3.79E-03 | 1.437 | 0.151 |  |
| CFM:2011 | 3.18E-03 | 4.91E-03 | 0.648 | 0.517 |  |
| CFM:2012 | 5.50E-03 | 5.78E-03 | 0.951 | 0.342 |  |
| CFM:2013 | 9.84E-03 | 6.87E-03 | 1.434 | 0.152 |  |
| CFM:2014 | 2.28E-02 | 8.68E-03 | 2.630 | 0.009 | ** |
| CFM:2015 | 2.55E-02 | 9.94E-03 | 2.568 | 0.011 | * |
| CFM:2016 | 2.48E-02 | 1.05E-02 | 2.363 | 0.019 | * |
| CFM:2017 | 3.08E-02 | 1.49E-02 | 2.069 | 0.039 | * |
| CFM:2018 | 2.73E-02 | 1.38E-02 | 1.977 | 0.049 | * |
| CFM:2019 | 1.68E-02 | 1.40E-02 | 1.203 | 0.230 |  |
| CFM:2020 | 1.65E-02 | 1.57E-02 | 1.049 | 0.295 |  |
| 2010:UrbanDistance | 1.24E-08 | 9.86E-09 | 1.253 | 0.211 |  |
| 2011:UrbanDistance | -6.40E-09 | 1.60E-08 | -0.400 | 0.689 |  |
| 2012:UrbanDistance | -1.78E-09 | 8.91E-09 | -0.200 | 0.842 |  |
| 2013:UrbanDistance | -6.60E-09 | 8.62E-09 | -0.765 | 0.445 |  |
| 2014:UrbanDistance | 1.61E-09 | 1.19E-08 | 0.135 | 0.893 |  |
| 2015:UrbanDistance | 1.14E-08 | 9.42E-09 | 1.213 | 0.226 |  |
| 2016:UrbanDistance | -7.50E-09 | 1.03E-08 | -0.726 | 0.468 |  |
| 2017:UrbanDistance | -9.54E-08 | 6.11E-08 | -1.560 | 0.120 |  |
| 2018:UrbanDistance | 7.65E-09 | 4.23E-08 | 0.181 | 0.857 |  |
| 2019:UrbanDistance | -6.03E-09 | 1.64E-08 | -0.368 | 0.713 |  |
| 2020:UrbanDistance | -1.99E-08 | 2.18E-08 | -0.916 | 0.360 |  |
| CFM:2010:UrbanDistance | -3.71E-08 | 3.08E-08 | -1.205 | 0.229 |  |
| CFM:2011:UrbanDistance | -3.35E-08 | 4.46E-08 | -0.752 | 0.453 |  |
| CFM:2012:UrbanDistance | -3.79E-08 | 4.81E-08 | -0.788 | 0.431 |  |
| CFM:2013:UrbanDistance | -4.27E-08 | 4.99E-08 | -0.856 | 0.393 |  |
| CFM:2014:UrbanDistance | -8.10E-08 | 6.52E-08 | -1.243 | 0.215 |  |
| CFM:2015:UrbanDistance | -1.40E-07 | 6.76E-08 | -2.067 | 0.039 | * |
| CFM:2016:UrbanDistance | -1.21E-07 | 5.90E-08 | -2.052 | 0.041 | * |
| CFM:2017:UrbanDistance | -1.14E-07 | 1.00E-07 | -1.137 | 0.256 |  |
| CFM:2018:UrbanDistance | -1.47E-07 | 7.17E-08 | -2.047 | 0.041 | * |
| CFM:2019:UrbanDistance | -3.73E-08 | 5.47E-08 | -0.683 | 0.495 |  |
| CFM:2020:UrbanDistance | -2.56E-08 | 5.61E-08 | -0.456 | 0.649 |  |

Signif. codes: 0 '***' 0.001 '**' 0.01 '*' 0.05 '.' 0.1 ' ' 1

RMSE: 0.065526 Adj. R2: 0.024955

Within R2: 0.0187

## Table S6. Event study model 3 (interaction term for level of development, all CFM, 90 m)

This variation on the event study model explores heterogeneity of outcomes based on level of development of the *fonkontany* (smallest administrative unit of Madagascar):

|  | (5) |
| --- | --- |

All variables are defined as above, the new variable, “*Development”,* an index of material assets, data provided by Wu Yang, Conservation International based on 2007 commune-level data originally collected by Moser et al.1. Also see Fig. S8.

OLS estimation, Dep. Var.: Annual deforestation

Observations: 372,032

Fixed-effects: UID: 23,252

Standard-errors: Clustered (cluster)

| Variable | estimate | std.error | statistic | p.value | signif |
| --- | --- | --- | --- | --- | --- |
| Year | -7.53E-04 | 2.76E-04 | -2.725 | 0.007 | ** |
| 2010 | 2.99E-03 | 1.50E-03 | 1.995 | 0.047 | * |
| 2011 | 5.19E-03 | 2.01E-03 | 2.581 | 0.010 | * |
| 2012 | 3.17E-03 | 1.36E-03 | 2.337 | 0.020 | * |
| 2013 | 3.70E-03 | 1.66E-03 | 2.233 | 0.026 | * |
| 2014 | 7.16E-03 | 2.80E-03 | 2.553 | 0.011 | * |
| 2015 | 6.42E-03 | 2.67E-03 | 2.407 | 0.017 | * |
| 2016 | 6.87E-03 | 2.59E-03 | 2.656 | 0.008 | ** |
| 2017 | 1.28E-02 | 6.06E-03 | 2.109 | 0.036 | * |
| 2018 | 1.89E-02 | 9.70E-03 | 1.950 | 0.052 | . |
| 2019 | 9.41E-03 | 3.47E-03 | 2.708 | 0.007 | ** |
| 2020 | 1.05E-02 | 6.83E-03 | 1.539 | 0.125 |  |
| Distance from forest edge | -5.34E-05 | 8.26E-06 | -6.472 | 0.000 | *** |
| Population density | -8.81E-06 | 3.77E-05 | -0.234 | 0.815 |  |
| Average rice price | -5.16E-09 | 3.44E-09 | -1.501 | 0.134 |  |
| Standard deviation in rice price | 2.11E-08 | 1.33E-08 | 1.592 | 0.112 |  |
| Drought severity (-) | -4.11E-06 | 2.00E-06 | -2.053 | 0.041 | * |
| Maximum precipitation | 4.91E-06 | 2.96E-06 | 1.661 | 0.098 | . |
| Maximum temperature | -9.90E-05 | 9.68E-05 | -1.023 | 0.307 |  |
| Maximum wind speed | -7.77E-06 | 1.25E-05 | -0.623 | 0.534 |  |
| CFM:Year | -1.68E-03 | 1.14E-03 | -1.476 | 0.141 |  |
| CFM:2010 | 3.23E-03 | 2.67E-03 | 1.208 | 0.228 |  |
| CFM:2011 | -1.15E-03 | 2.68E-03 | -0.428 | 0.669 |  |
| CFM:2012 | 1.07E-03 | 2.80E-03 | 0.383 | 0.702 |  |
| CFM:2013 | 4.34E-03 | 3.79E-03 | 1.144 | 0.253 |  |
| CFM:2014 | 1.64E-02 | 5.63E-03 | 2.915 | 0.004 | ** |
| CFM:2015 | 1.71E-02 | 6.39E-03 | 2.671 | 0.008 | ** |
| CFM:2016 | 1.46E-02 | 6.96E-03 | 2.098 | 0.037 | * |
| CFM:2017 | 2.02E-02 | 1.03E-02 | 1.964 | 0.050 | . |
| CFM:2018 | 1.23E-02 | 1.30E-02 | 0.941 | 0.347 |  |
| CFM:2019 | 1.18E-02 | 1.08E-02 | 1.098 | 0.273 |  |
| CFM:2020 | 1.06E-02 | 1.32E-02 | 0.804 | 0.422 |  |
| 2010:Development | -1.61E-03 | 1.14E-03 | -1.415 | 0.158 |  |
| 2011:Development | 6.48E-04 | 2.07E-03 | 0.314 | 0.754 |  |
| 2012:Development | 1.34E-03 | 1.34E-03 | 0.997 | 0.319 |  |
| 2013:Development | 1.33E-03 | 9.32E-04 | 1.430 | 0.154 |  |
| 2014:Development | 2.76E-04 | 2.14E-03 | 0.129 | 0.897 |  |
| 2015:Development | 2.92E-04 | 1.40E-03 | 0.208 | 0.835 |  |
| 2016:Development | 2.21E-03 | 1.99E-03 | 1.112 | 0.267 |  |
| 2017:Development | 3.45E-03 | 5.35E-03 | 0.644 | 0.520 |  |
| 2018:Development | -8.03E-03 | 9.05E-03 | -0.887 | 0.376 |  |
| 2019:Development | 3.72E-03 | 2.67E-03 | 1.393 | 0.165 |  |
| 2020:Development | -5.38E-04 | 4.63E-03 | -0.116 | 0.907 |  |
| CFM:2010:Development | -6.91E-04 | 3.41E-03 | -0.203 | 0.840 |  |
| CFM:2011:Development | 6.49E-03 | 4.18E-03 | 1.552 | 0.122 |  |
| CFM:2012:Development | 5.75E-03 | 4.02E-03 | 1.431 | 0.153 |  |
| CFM:2013:Development | 8.06E-03 | 4.37E-03 | 1.845 | 0.066 | . |
| CFM:2014:Development | 3.84E-03 | 6.72E-03 | 0.571 | 0.569 |  |
| CFM:2015:Development | -3.81E-04 | 6.08E-03 | -0.063 | 0.950 |  |
| CFM:2016:Development | 8.06E-03 | 5.56E-03 | 1.451 | 0.148 |  |
| CFM:2017:Development | 1.13E-02 | 1.08E-02 | 1.049 | 0.295 |  |
| CFM:2018:Development | 1.57E-02 | 1.05E-02 | 1.504 | 0.133 |  |
| CFM:2019:Development | 7.54E-03 | 5.42E-03 | 1.392 | 0.165 |  |
| CFM:2020:Development | 1.11E-02 | 6.80E-03 | 1.629 | 0.104 |  |

Signif. codes: 0 '***' 0.001 '**' 0.01 '*' 0.05 '.' 0.1 ' ' 1

RMSE: 0.065538 Adj. R2: 0.024606

Within R2: 0.018349

## Table S7. Event study model 4 (interaction term for level of security, all CFM, 90m)

This variation on the event study model explores heterogeneity of outcomes based on level of security / risk of theft of the *fonkontany* (smallest administrative unit of Madagascar):

|  | (6) |
| --- | --- |

All variables are defined as above, the new variable, “*Security”,* an indicator of security/risk of theft, used here as a proxy for the level of enforcement (e.g. of forest protection rules). Data provided by Wu Yang, Conservation International based on 2007 commune-level data originally collected by Moser et al. 1.

Results:

OLS estimation, Dep. Var.: Annual deforestation

Observations: 372,032

Fixed-effects: UID: 23,252, vegtype: 3

Standard-errors: Clustered (cluster)

| Variable | estimate | std.error | statistic | p.value | signif |
| --- | --- | --- | --- | --- | --- |
| Year | -7.80E-04 | 2.85E-04 | -2.735 | 0.007 | ** |
| 2010 | 1.47E-03 | 1.09E-03 | 1.343 | 0.180 |  |
| 2011 | 6.78E-03 | 2.12E-03 | 3.193 | 0.002 | ** |
| 2012 | 4.05E-03 | 1.29E-03 | 3.147 | 0.002 | ** |
| 2013 | 3.37E-03 | 1.60E-03 | 2.107 | 0.036 | * |
| 2014 | 6.04E-03 | 2.11E-03 | 2.862 | 0.004 | ** |
| 2015 | 6.74E-03 | 2.78E-03 | 2.421 | 0.016 | * |
| 2016 | 9.15E-03 | 3.16E-03 | 2.892 | 0.004 | ** |
| 2017 | 1.39E-02 | 6.63E-03 | 2.096 | 0.037 | * |
| 2018 | 2.26E-02 | 1.05E-02 | 2.149 | 0.032 | * |
| 2019 | 1.12E-02 | 3.73E-03 | 3.011 | 0.003 | ** |
| 2020 | 1.37E-02 | 7.76E-03 | 1.768 | 0.078 | . |
| Distance from forest edge | -5.36E-05 | 8.37E-06 | -6.410 | 0.000 | *** |
| Population density | -1.27E-05 | 4.31E-05 | -0.296 | 0.768 |  |
| Average rice price | -6.05E-09 | 3.39E-09 | -1.787 | 0.075 | . |
| Standard deviation in rice price | 2.23E-08 | 1.30E-08 | 1.714 | 0.087 | . |
| Drought severity (-) | -3.62E-06 | 1.97E-06 | -1.841 | 0.066 | . |
| Maximum precipitation | 6.41E-06 | 2.87E-06 | 2.232 | 0.026 | * |
| Maximum temperature | -1.83E-05 | 7.11E-05 | -0.257 | 0.797 |  |
| Maximum wind speed | -5.93E-06 | 1.17E-05 | -0.507 | 0.612 |  |
| CFM:Year | -1.69E-03 | 1.16E-03 | -1.465 | 0.144 |  |
| CFM:2010 | 3.24E-03 | 3.52E-03 | 0.920 | 0.358 |  |
| CFM:2011 | 7.86E-04 | 4.74E-03 | 0.166 | 0.868 |  |
| CFM:2012 | 3.05E-03 | 5.37E-03 | 0.568 | 0.570 |  |
| CFM:2013 | 9.01E-03 | 6.51E-03 | 1.384 | 0.167 |  |
| CFM:2014 | 1.91E-02 | 8.30E-03 | 2.300 | 0.022 | * |
| CFM:2015 | 1.61E-02 | 9.37E-03 | 1.716 | 0.087 | . |
| CFM:2016 | 1.42E-02 | 1.01E-02 | 1.411 | 0.159 |  |
| CFM:2017 | 1.35E-02 | 1.27E-02 | 1.064 | 0.288 |  |
| CFM:2018 | 8.48E-03 | 1.57E-02 | 0.540 | 0.589 |  |
| CFM:2019 | 1.19E-02 | 1.34E-02 | 0.883 | 0.378 |  |
| CFM:2020 | 1.06E-02 | 1.61E-02 | 0.662 | 0.509 |  |
| 2010:Development | 1.24E-03 | 1.57E-03 | 0.789 | 0.431 |  |
| 2011:Development | -2.20E-03 | 1.96E-03 | -1.120 | 0.264 |  |
| 2012:Development | 1.39E-04 | 1.21E-03 | 0.115 | 0.908 |  |
| 2013:Development | 1.21E-03 | 9.65E-04 | 1.256 | 0.210 |  |
| 2014:Development | 2.20E-03 | 2.12E-03 | 1.038 | 0.300 |  |
| 2015:Development | -4.50E-04 | 1.31E-03 | -0.343 | 0.732 |  |
| 2016:Development | -2.23E-03 | 2.14E-03 | -1.040 | 0.299 |  |
| 2017:Development | 1.14E-03 | 5.34E-03 | 0.214 | 0.831 |  |
| 2018:Development | -1.35E-02 | 9.56E-03 | -1.412 | 0.159 |  |
| 2019:Development | -1.06E-03 | 2.38E-03 | -0.445 | 0.656 |  |
| 2020:Development | -5.70E-03 | 5.48E-03 | -1.040 | 0.299 |  |
| CFM:2010:Development | -1.10E-04 | 4.38E-03 | -0.025 | 0.980 |  |
| CFM:2011:Development | 5.05E-04 | 5.29E-03 | 0.095 | 0.924 |  |
| CFM:2012:Development | 3.11E-04 | 5.38E-03 | 0.058 | 0.954 |  |
| CFM:2013:Development | -3.44E-03 | 5.73E-03 | -0.600 | 0.549 |  |
| CFM:2014:Development | -2.25E-03 | 8.16E-03 | -0.276 | 0.783 |  |
| CFM:2015:Development | 1.80E-03 | 7.58E-03 | 0.237 | 0.813 |  |
| CFM:2016:Development | 6.54E-03 | 7.52E-03 | 0.869 | 0.385 |  |
| CFM:2017:Development | 2.21E-02 | 1.25E-02 | 1.773 | 0.077 | . |
| CFM:2018:Development | 1.87E-02 | 1.22E-02 | 1.533 | 0.126 |  |
| CFM:2019:Development | 5.07E-03 | 6.71E-03 | 0.755 | 0.451 |  |
| CFM:2020:Development | 7.87E-03 | 8.39E-03 | 0.938 | 0.349 |  |

Signif. codes: 0 '***' 0.001 '**' 0.01 '*' 0.05 '.' 0.1 ' ' 1

RMSE: 0.06552 Adj. R2: 0.025152

Within R2: 0.018898

## Table S8. Event study model 5 (interaction term for population density, all CFM, 90m)

This variation on the event study model explores heterogeneity of outcomes based on population density:

|  | (7) |
| --- | --- |

All variables are defined as above, the new variable, “*Population”,* a measure of population density (people per square kilometer) in the baseline year (2005) 3.

OLS estimation, Dep. Var.: Annual deforestation

Observations: 372,032

Fixed-effects: UID: 23,252

Standard-errors: Clustered (cluster)

| Variable | estimate | std.error | statistic | p.value | signif |
| --- | --- | --- | --- | --- | --- |
| Year | -7.86E-04 | 2.81E-04 | -2.80 | 0.01 | ** |
| 2010 | 2.84E-03 | 1.48E-03 | 1.92 | 0.06 | . |
| 2011 | 5.66E-03 | 1.92E-03 | 2.94 | 0.00 | ** |
| 2012 | 2.67E-03 | 1.51E-03 | 1.77 | 0.08 | . |
| 2013 | 4.28E-03 | 1.78E-03 | 2.41 | 0.02 | * |
| 2014 | 8.09E-03 | 2.60E-03 | 3.11 | 0.00 | ** |
| 2015 | 6.84E-03 | 2.62E-03 | 2.61 | 0.01 | ** |
| 2016 | 7.42E-03 | 2.95E-03 | 2.52 | 0.01 | * |
| 2017 | 1.29E-02 | 5.23E-03 | 2.47 | 0.01 | * |
| 2018 | 1.69E-02 | 7.79E-03 | 2.16 | 0.03 | * |
| 2019 | 1.02E-02 | 3.75E-03 | 2.71 | 0.01 | ** |
| 2020 | 1.06E-02 | 6.26E-03 | 1.69 | 0.09 | . |
| Population density | 3.52E-06 | 6.48E-05 | 0.05 | 0.96 |  |
| Distance from forest edge | -5.31E-05 | 8.46E-06 | -6.28 | 0.00 | *** |
| Average rice price | -5.50E-09 | 3.60E-09 | -1.53 | 0.13 |  |
| Standard deviation in rice price | 2.15E-08 | 1.34E-08 | 1.61 | 0.11 |  |
| Drought severity (-) | -3.26E-06 | 1.99E-06 | -1.63 | 0.10 |  |
| Maximum precipitation | 5.36E-06 | 2.94E-06 | 1.82 | 0.07 | . |
| Maximum temperature | -7.05E-05 | 8.59E-05 | -0.82 | 0.41 |  |
| Maximum wind speed | -6.88E-06 | 1.15E-05 | -0.60 | 0.55 |  |
| CFM:Year | -1.69E-03 | 1.14E-03 | -1.48 | 0.14 |  |
| CFM:2010 | 3.79E-03 | 2.74E-03 | 1.38 | 0.17 |  |
| CFM:2011 | 5.39E-04 | 2.82E-03 | 0.19 | 0.85 |  |
| CFM:2012 | 5.04E-03 | 3.22E-03 | 1.57 | 0.12 |  |
| CFM:2013 | 7.58E-03 | 4.20E-03 | 1.81 | 0.07 | . |
| CFM:2014 | 1.96E-02 | 5.72E-03 | 3.42 | 0.00 | *** |
| CFM:2015 | 1.86E-02 | 6.57E-03 | 2.83 | 0.00 | ** |
| CFM:2016 | 1.85E-02 | 7.35E-03 | 2.52 | 0.01 | * |
| CFM:2017 | 3.03E-02 | 1.01E-02 | 2.99 | 0.00 | ** |
| CFM:2018 | 1.81E-02 | 1.20E-02 | 1.51 | 0.13 |  |
| CFM:2019 | 1.52E-02 | 1.11E-02 | 1.37 | 0.17 |  |
| CFM:2020 | 1.29E-02 | 1.33E-02 | 0.97 | 0.33 |  |
| CFM:Population | -1.10E-05 | 1.46E-04 | -0.08 | 0.94 |  |
| 2010:Population | -2.40E-05 | 2.00E-05 | -1.20 | 0.23 |  |
| 2011:Population | -3.90E-06 | 2.63E-05 | -0.15 | 0.88 |  |
| 2012:Population | 5.90E-05 | 3.74E-05 | 1.58 | 0.12 |  |
| 2013:Population | 1.26E-06 | 2.18E-05 | 0.06 | 0.95 |  |
| 2014:Population | -2.97E-05 | 2.99E-05 | -0.99 | 0.32 |  |
| 2015:Population | -7.84E-06 | 2.92E-05 | -0.27 | 0.79 |  |
| 2016:Population | 2.26E-05 | 4.04E-05 | 0.56 | 0.58 |  |
| 2017:Population | 6.00E-05 | 6.69E-05 | 0.90 | 0.37 |  |
| 2018:Population | -4.48E-05 | 7.21E-05 | -0.62 | 0.54 |  |
| 2019:Population | 2.62E-05 | 4.49E-05 | 0.58 | 0.56 |  |
| 2020:Population | 1.15E-06 | 5.46E-05 | 0.02 | 0.98 |  |
| CFM:2010:Population | -3.09E-05 | 4.47E-05 | -0.69 | 0.49 |  |
| CFM:2011:Population | 3.16E-05 | 5.43E-05 | 0.58 | 0.56 |  |
| CFM:2012:Population | -8.19E-05 | 5.90E-05 | -1.39 | 0.17 |  |
| CFM:2013:Population | -1.24E-05 | 6.15E-05 | -0.20 | 0.84 |  |
| CFM:2014:Population | -6.67E-05 | 7.70E-05 | -0.87 | 0.39 |  |
| CFM:2015:Population | -6.15E-05 | 6.85E-05 | -0.90 | 0.37 |  |
| CFM:2016:Population | -3.79E-05 | 7.18E-05 | -0.53 | 0.60 |  |
| CFM:2017:Population | -2.26E-04 | 1.16E-04 | -1.95 | 0.05 | . |
| CFM:2018:Population | 1.37E-05 | 1.01E-04 | 0.14 | 0.89 |  |
| CFM:2019:Population | -2.40E-05 | 7.50E-05 | -0.32 | 0.75 |  |
| CFM:2020:Population | 6.41E-05 | 9.02E-05 | 0.71 | 0.48 |  |

Signif. codes: 0 '***' 0.001 '**' 0.01 '*' 0.05 '.' 0.1 ' ' 1

RMSE: 0.065548 Adj. R2: 0.024313

Within R2: 0.018057

## Table S9. Results of test of parallel trends in the pre-crisis period

The coefficient of interest is the interaction between CFM and year. Results shown are from all CFM established before 2005, at 90 m spatial resolution.

OLS estimation, dependent variable: annual deforestation

Observations: 116,260

Fixed-effects: UID: 23,252

Standard-errors: Clustered

| term | estimate | std.error | statistic | p.value | signif |
| --- | --- | --- | --- | --- | --- |
| year2006 | -4.17E-03 | 1.56E-03 | -2.674 | 0.008 | ** |
| year2007 | -4.35E-03 | 1.23E-03 | -3.530 | 0.000 | *** |
| year2008 | -4.55E-03 | 1.68E-03 | -2.702 | 0.007 | ** |
| year2009 | -5.95E-03 | 1.80E-03 | -3.309 | 0.001 | ** |
| Distance to forest edge | -1.02E-04 | 3.14E-05 | -3.254 | 0.001 | ** |
| Population density | 1.00E-04 | 8.19E-05 | 1.223 | 0.222 |  |
| Average rice price | -7.67E-10 | 5.92E-09 | -0.130 | 0.897 |  |
| Standard deviation in rice price | 8.91E-09 | 1.43E-08 | 0.623 | 0.534 |  |
| Drought severity (-) | 2.99E-06 | 2.95E-06 | 1.015 | 0.311 |  |
| Maximum precipitation | 3.03E-06 | 4.09E-06 | 0.742 | 0.459 |  |
| Maximum temperature | -3.07E-05 | 1.73E-04 | -0.178 | 0.859 |  |
| Maximum wind speed | -3.83E-05 | 2.48E-05 | -1.546 | 0.123 |  |
| CFM:year2006 | -1.21E-03 | 3.19E-03 | -0.378 | 0.705 |  |
| CFM:year2007 | -4.03E-03 | 4.47E-03 | -0.901 | 0.368 |  |
| CFM:year2008 | -5.41E-03 | 4.08E-03 | -1.327 | 0.185 |  |
| CFM:year2009 | -6.82E-03 | 4.18E-03 | -1.633 | 0.103 |  |

Signif. codes: 0 '***' 0.001 '**' 0.01 '*' 0.05 '.' 0.1 ' ' 1

RMSE: 0.047993 Adj. R2: 0.026602 Within R2: 0.010348

# Supplemental References

1. Moser, C., Ralison, E., Randrianjatovo, J. F. & Ravelomanana, S. *Enquête sur le suivi du recensement des communes de Madagascar Année 2007 (2007 Monitoring Census Survey of Madagascar Communes). Final Report.* (2008).

2. Rasolofoson, R. A., Ferraro, P. J., Jenkins, C. N. & Jones, J. P. G. Effectiveness of Community Forest Management at reducing deforestation in Madagascar. *Biological Conservation* **184**, 271–277 (2015).

3. WorldPop. *Global High Resolution Population Denominators Project*. https://dx.doi.org/10.5258/SOTON/WP00674 (2018).
